# Supplementary material for: Stepwise Diagnostic Product Ions Filtering Strategy for Rapid Discovery of Diterpenoids in Scutellaria barbata Based on UHPLC-Q-Exactive-Orbitrap-MS
Source: MDPI journal article supplement (doi:10.3390/molecules27238185), 2022-11-24
Supplement: s1 [file s1]

## Supplementary material

Article

# Stepwise Diagnostic Product Ions Filtering Strategy for Rapid Discovery of Diterpenoids in *Scutellaria barbata* Based on UHPLC-Q-Exactive-Orbitrap-MS

Xinhua Zhou <sup>†</sup>, Xu Chen <sup>†</sup>, Liping Fan, Huirong Dong, Yan Ren <sup>\*</sup> and Xiangming Chen

School of Pharmacy, Binzhou Medical University, Yantai 264003, China

<sup>\*</sup> Correspondence: renyan198251@163.com

<sup>†</sup> These authors contributed equally to this work.

## Abbreviations Used

DPIs, diagnostic product ions; UHPLC-HRMS/MS, ultra high-performance liquid chromatography/tandem high-resolution mass spectrometry; Q-Exactive Orbitrap/MS, tandem Q-Exactive orbitrap mass spectrometry; TCM, traditional Chinese medicine; MDF, mass defect filtering; NLF, neutral loss filtering; EIC, extraction ion chromatography; KIF, key ion filtering; HCD, higher energy collision induced dissociation; NCE, normalized collision energy; TIC, total ion chromatogram.

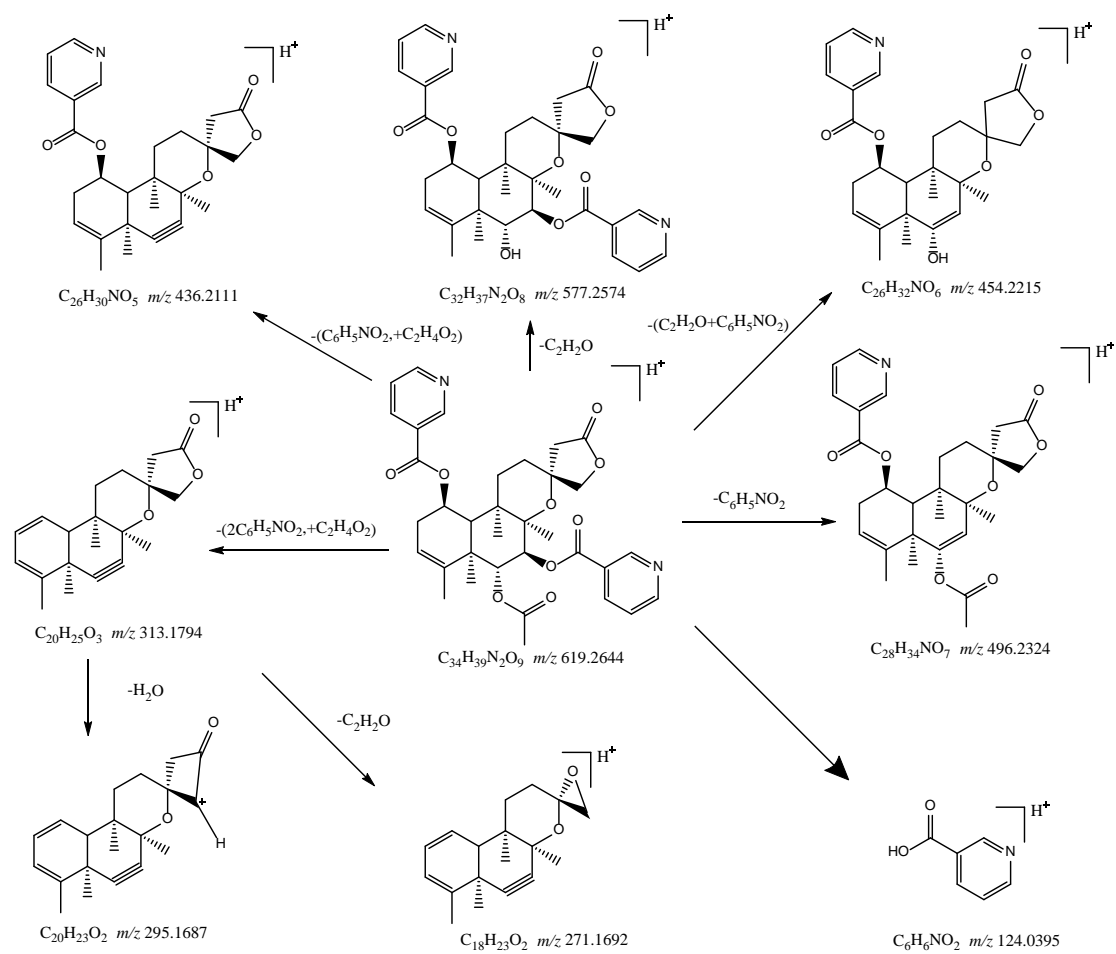

**Figure S1** Product ion formation pathways for 6-O-nicotinoyl-7-O-acetylscutebarbatine G.

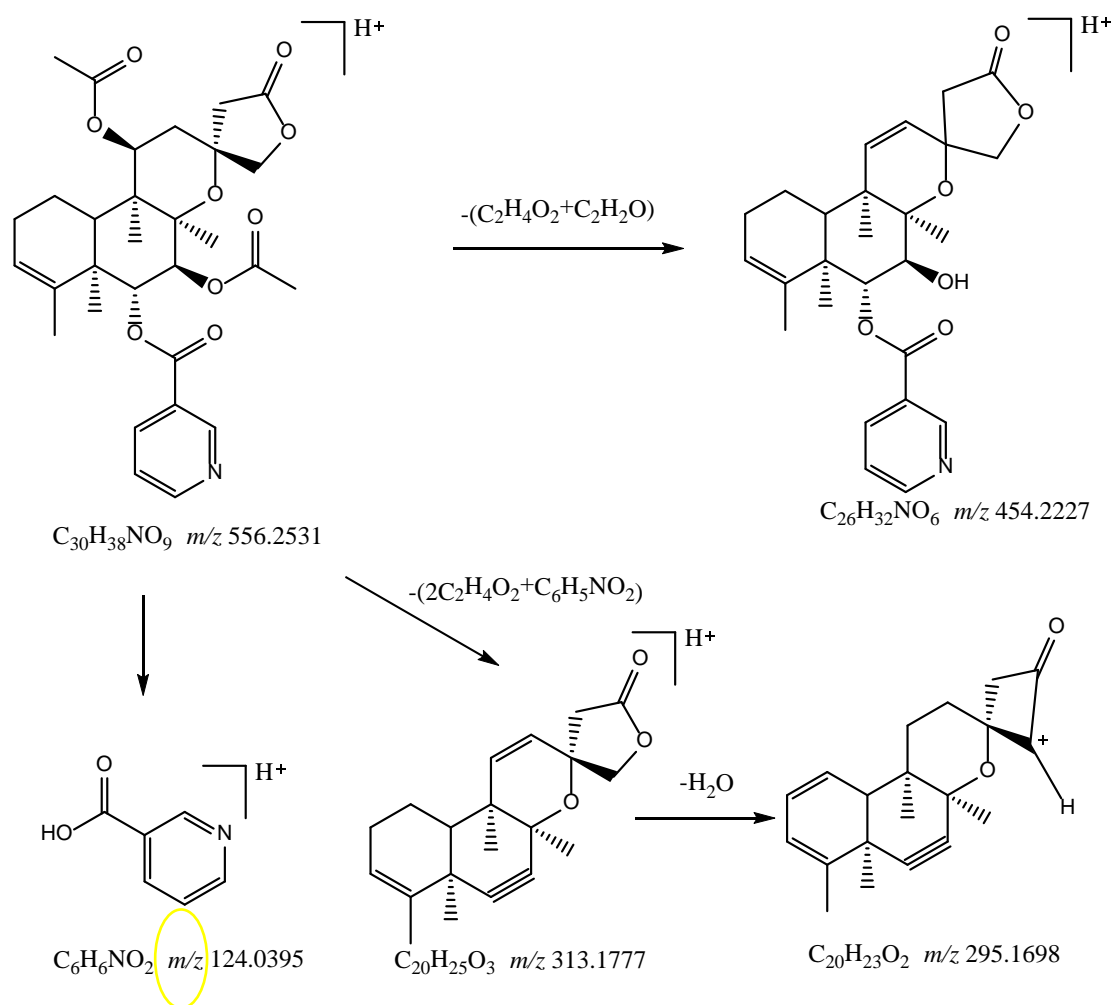

**Figure S2** Product ion formation pathways for scutebarbatine F.

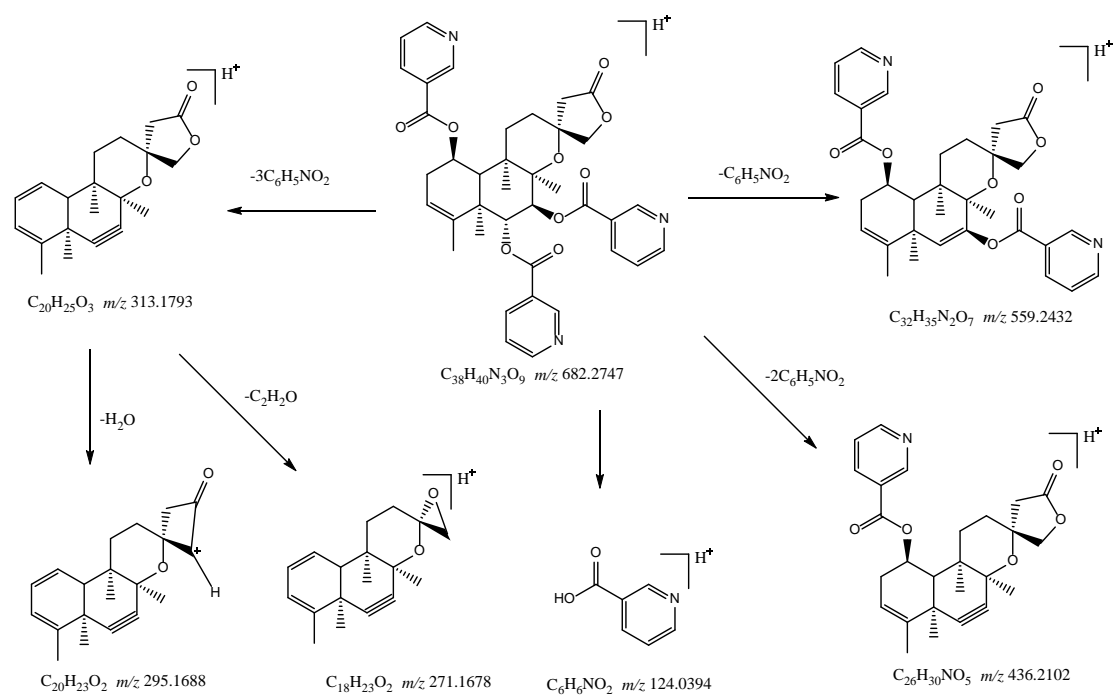

**Figure S3** Product ion formation pathways for 6,7-di-O-nicotinoylscutebarbatine G.

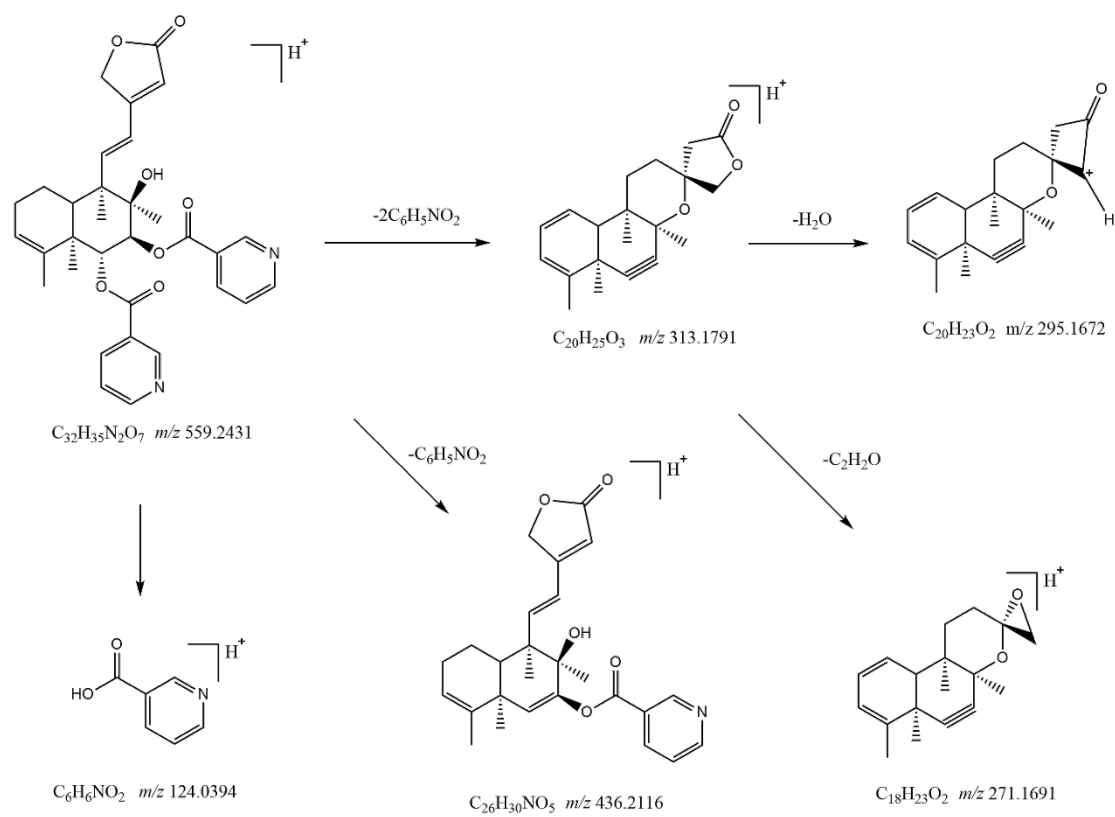

**Figure S4** Product ion formation pathways for scutebarbatine A.

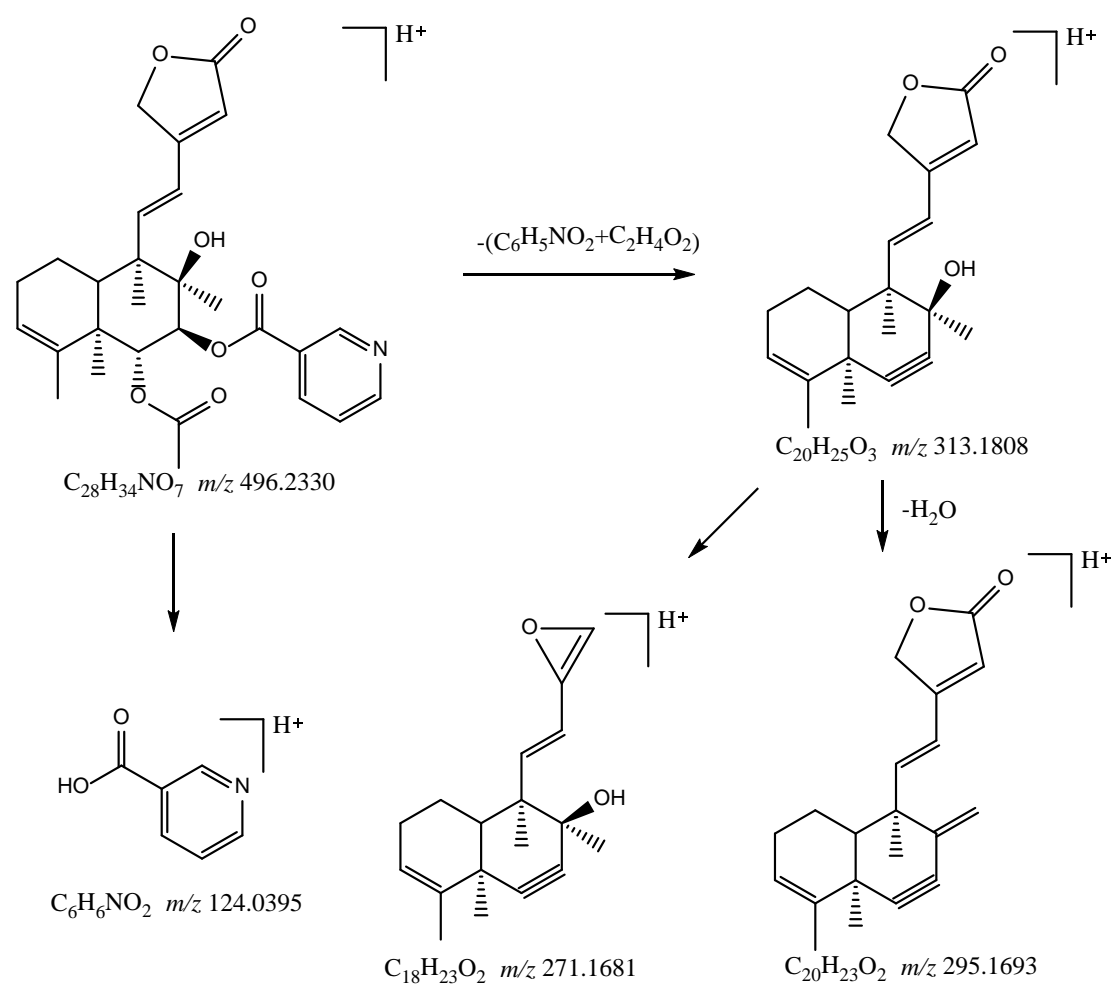

**Figure S5** Product ion formation pathways for 6-O-acetylscutehenanine A.

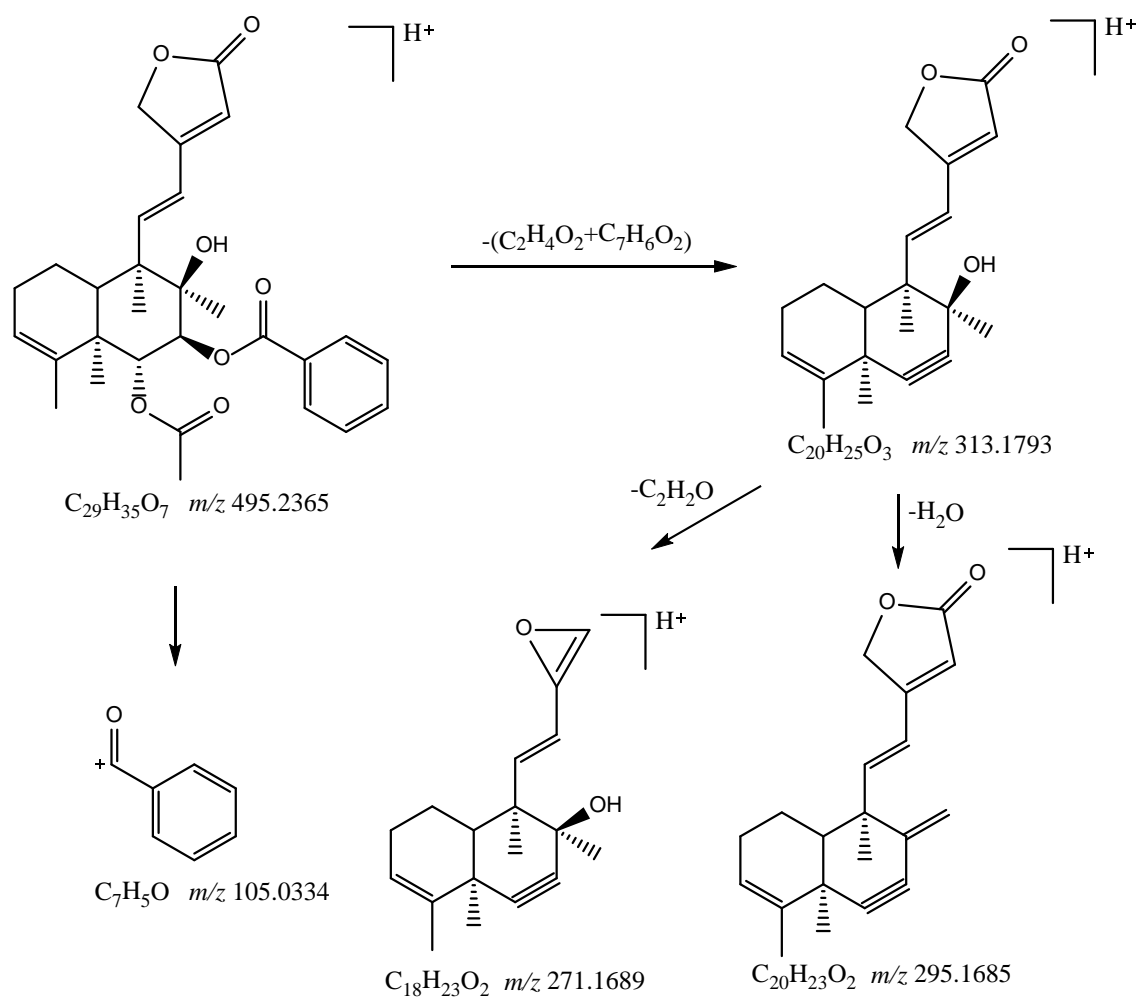

**Figure S6** Product ion formation pathways for scutolide E.

**Table S1.** UHPLC-HRMS/MS analysis of six reference standards.

| NO. | <i>T<sub>R</sub></i><br>(min) | Compounds                                 | Experimental<br>Mass <i>m/z</i> | Theoretical<br>Mass <i>m/z</i> | Molecular<br>formula                                          | Error<br>(ppm) | MS <sup>2</sup> Fragmentation                                           |
|-----|-------------------------------|-------------------------------------------|---------------------------------|--------------------------------|---------------------------------------------------------------|----------------|-------------------------------------------------------------------------|
| 1   | 11.06                         | 6-O-nicotinoyl-7-O-acetylscutebarbatine G | 619.2644                        | 619.2650                       | C <sub>34</sub> H <sub>39</sub> O <sub>9</sub> N <sub>2</sub> | -0.980         | 124.0395,496.2324,313.1794,577.2524,454.2215,295.1687,436.2111,271.1692 |
| 2   | 11.24                         | Scutebarbatine F                          | 556.2531                        | 556.2541                       | C <sub>30</sub> H <sub>38</sub> O <sub>9</sub> N              | -1.812         | 124.0395,313.1777,295.1698,454.2227                                     |
| 3   | 11.47                         | Scutebarbatine A                          | 559.2431                        | 559.2439                       | C <sub>32</sub> H <sub>35</sub> O <sub>7</sub> N <sub>2</sub> | -1.391         | 124.0394,436.2116,295.1672,313.1791,271.1691                            |
| 4   | 11.67                         | 6,7-di-O-nicotinoylscutebarbatine G       | 682.2747                        | 682.2759                       | C <sub>38</sub> H <sub>40</sub> O <sub>9</sub> N <sub>3</sub> | -1.768         | 124.0394,313.1793,436.2102,295.1688,559.2432,271.1678                   |
| 5   | 12.07                         | 6-O-acetylscutehenanine A                 | 496.2324                        | 496.2330                       | C <sub>28</sub> H <sub>34</sub> O <sub>7</sub> N              | -2.292         | 124.0395,496.2324,295.1693,313.1808,271.1681                            |
| 6   | 14.38                         | Scutolide E                               | 495.2365                        | 495.2377                       | C <sub>29</sub> H <sub>35</sub> O <sub>7</sub>                | -2.483         | 105.0334,313.1793,295.1685,271.1689                                     |

**Table S2.** Systematic exposure and characterization of 381 diterpenoids in *Scutellaria barbata* using stepwise DPIs filtering strategy.

| NO.             | $T_R$<br>(min) | Experimenta<br>l Mass $m/z$ | Theoretical<br>Mass $m/z$ | Precursors/<br>Adduct | Molecular<br>formula                                          | Error<br>(ppm) | MS <sup>2</sup> Fragmentation                                                | Identification                                               |
|-----------------|----------------|-----------------------------|---------------------------|-----------------------|---------------------------------------------------------------|----------------|------------------------------------------------------------------------------|--------------------------------------------------------------|
| 1 <sup>a</sup>  | 6.66           | 546.2332                    | 546.2334                  | [M+H] <sup>+</sup>    | C <sub>28</sub> H <sub>36</sub> O <sub>10</sub> N             | -0.307         | 124.0395,468.2010,486.2155,345.1702,327.1579,309.1479                        | C <sub>20</sub> H <sub>27</sub> O <sub>6</sub> -NicA-AcA     |
| 2               | 6.91           | 544.2172                    | 544.2177                  | [M+H] <sup>+</sup>    | C <sub>28</sub> H <sub>34</sub> O <sub>10</sub> N             | -0.951         | 124.0394,484.1961,466.1859,343.1543,325.1432                                 | C <sub>20</sub> H <sub>25</sub> O <sub>6</sub> -NicA-AcA     |
| 3 <sup>a</sup>  | 6.91           | 488.2270                    | 488.2279                  | [M+H] <sup>+</sup>    | C <sub>26</sub> H <sub>34</sub> O <sub>8</sub> N              | -1.830         | 124.0394,311.1629,329.1737                                                   | C <sub>20</sub> H <sub>29</sub> O <sub>6</sub> -NicA         |
| 4 <sup>a</sup>  | 7.17           | 678.3101                    | 678.3120                  | [M+H] <sup>+</sup>    | C <sub>34</sub> H <sub>48</sub> O <sub>13</sub> N             | -2.826         | 124.0395,297.1847,315.1952,438.2271,498.2482,660.3021                        | C <sub>20</sub> H <sub>27</sub> O <sub>3</sub> -NicA-AcA-Glc |
| 5 <sup>a</sup>  | 7.30           | 546.2321                    | 546.2334                  | [M+H] <sup>+</sup>    | C <sub>28</sub> H <sub>36</sub> O <sub>10</sub> N             | -2.330         | 124.0394,327.1579,345.1688,454.2193                                          | C <sub>20</sub> H <sub>27</sub> O <sub>6</sub> -NicA-AcA     |
| 6               | 7.52           | 472.2323                    | 472.2330                  | [M+H] <sup>+</sup>    | C <sub>26</sub> H <sub>34</sub> O <sub>7</sub> N              | -1.437         | 124.0395,295.1683,313.1800,331.1911,454.2201,472.2323                        | C <sub>20</sub> H <sub>29</sub> O <sub>5</sub> -NicA         |
| 7               | 7.56           | 575.2382                    | 575.2388                  | [M+H] <sup>+</sup>    | C <sub>32</sub> H <sub>35</sub> O <sub>8</sub> N <sub>2</sub> | -1.030         | 124.0394,293.1526,311.1628,329.1733,434.1948,452.2060                        | C <sub>20</sub> H <sub>25</sub> O <sub>4</sub> -2NicA        |
| 8               | 7.60           | 530.2385                    | 530.2385                  | [M+H] <sup>+</sup>    | C <sub>28</sub> H <sub>36</sub> O <sub>9</sub> N              | 0.079          | 124.0395,293.1537,311.1631,329.1733,470.2187                                 | C <sub>20</sub> H <sub>27</sub> O <sub>5</sub> -NicA-AcA     |
| 9               | 7.61           | 472.2324                    | 472.2330                  | [M+H] <sup>+</sup>    | C <sub>26</sub> H <sub>34</sub> O <sub>7</sub> N              | -1.226         | 124.0395,313.1795,331.1891,472.2324                                          | C <sub>20</sub> H <sub>29</sub> O <sub>5</sub> -NicA         |
| 10 <sup>a</sup> | 7.74           | 512.2269                    | 512.2279                  | [M+H] <sup>+</sup>    | C <sub>28</sub> H <sub>34</sub> O <sub>8</sub> N              | -1.939         | 124.0395,293.1525,311.1640,329.1733,434.1927,452.2059                        | C <sub>20</sub> H <sub>25</sub> O <sub>4</sub> -NicA-AcA     |
| 11 <sup>a</sup> | 7.79           | 546.2335                    | 546.2334                  | [M+H] <sup>+</sup>    | C <sub>28</sub> H <sub>36</sub> O <sub>10</sub> N             | 0.233          | 124.0395,327.1600,345.1697,486.2130,546.2335                                 | C <sub>20</sub> H <sub>27</sub> O <sub>6</sub> -NicA-AcA     |
| 12              | 7.84           | 472.2323                    | 472.2330                  | [M+H] <sup>+</sup>    | C <sub>26</sub> H <sub>34</sub> O <sub>7</sub> N              | -1.437         | 124.0394,295.1686,313.1798,331.1896                                          | C <sub>20</sub> H <sub>29</sub> O <sub>5</sub> -NicA         |
| 13              | 7.89           | 530.2404                    | 530.2385                  | [M+H] <sup>+</sup>    | C <sub>28</sub> H <sub>36</sub> O <sub>9</sub> N              | 3.662          | 124.0394,293.1533,311.1634,329.1748,434.1935,452.2018                        | C <sub>20</sub> H <sub>27</sub> O <sub>5</sub> -NicA-AcA     |
| 14              | 7.99           | 530.2386                    | 530.2385                  | [M+H] <sup>+</sup>    | C <sub>28</sub> H <sub>36</sub> O <sub>9</sub> N              | 0.362          | 124.0395,293.1528,311.1638,329.1752,434.1942,452.2067,470.2174,<br>,530.2386 | C <sub>20</sub> H <sub>27</sub> O <sub>5</sub> -NicA-AcA     |
| 15 <sup>a</sup> | 8.07           | 590.2943                    | 590.2960                  | [M+H] <sup>+</sup>    | C <sub>31</sub> H <sub>44</sub> O <sub>10</sub> N             | -2.834         | 124.0395,297.1842,315.1952,438.2270,456.2387,498.2475                        | C <sub>20</sub> H <sub>27</sub> O <sub>3</sub> -NicA-AcA-X1  |
| 16              | 8.10           | 530.2379                    | 530.2385                  | [M+H] <sup>+</sup>    | C <sub>28</sub> H <sub>36</sub> O <sub>9</sub> N              | -1.053         | 124.0395,293.1523,311.1619,329.1743,347.1851,434.1947,452.2065,<br>,470.2164 | C <sub>20</sub> H <sub>27</sub> O <sub>5</sub> -NicA-AcA     |
| 17              | 8.12           | 593.2477                    | 593.2494                  | [M+H] <sup>+</sup>    | C <sub>32</sub> H <sub>37</sub> O <sub>9</sub> N <sub>2</sub> | -2.793         | 124.0395,311.1648,329.1743,452.2070,470.2170                                 | C <sub>20</sub> H <sub>27</sub> O <sub>5</sub> -2NicA        |
| 18              | 8.13           | 573.2225                    | 573.2231                  | [M+H] <sup>+</sup>    | C <sub>32</sub> H <sub>33</sub> O <sub>8</sub> N <sub>2</sub> | -1.121         | 124.0395,309.1495,327.1581,450.1905                                          | C <sub>20</sub> H <sub>23</sub> O <sub>4</sub> -2NicA        |
| 19 <sup>a</sup> | 8.14           | 692.2893                    | 692.2913                  | [M+H] <sup>+</sup>    | C <sub>34</sub> H <sub>46</sub> O <sub>14</sub> N             | -2.862         | 124.0395,311.1638,329.1745,347.1836,452.2060,470.2156,512.2277,<br>,530.2385 | C <sub>20</sub> H <sub>25</sub> O <sub>4</sub> -NicA-AcA-Glc |
| 20 <sup>a</sup> | 8.17           | 560.2477                    | 560.2490                  | [M+H] <sup>+</sup>    | C <sub>29</sub> H <sub>38</sub> O <sub>10</sub> N             | -2.361         | 124.0395,291.1375,309.1481,327.1589,345.1685,468.2025,500.2265               | C <sub>20</sub> H <sub>25</sub> O <sub>5</sub> -NicA-X1      |



|                 |      |          |           |                    |                                                                |        |                                                                                                        |                                                           |
|-----------------|------|----------|-----------|--------------------|----------------------------------------------------------------|--------|--------------------------------------------------------------------------------------------------------|-----------------------------------------------------------|
|                 |      |          |           |                    |                                                                |        | ,528.2182                                                                                              |                                                           |
| 21 <sup>a</sup> | 8.17 | 528.2211 | 528.2228  | [M+H] <sup>+</sup> | C <sub>28</sub> H <sub>34</sub> O <sub>9</sub> N               | -3.234 | 124.0395,309.1475,327.1582,345.1692,450.1920,468.2002                                                  | C <sub>20</sub> H <sub>25</sub> O <sub>5</sub> -NicA-AcA  |
| 22 <sup>a</sup> | 8.30 | 418.2576 | 418.2588  | [M+H] <sup>+</sup> | C <sub>24</sub> H <sub>36</sub> O <sub>5</sub> N               | -2.868 | 124.0395,259.2049,277.2145,400.2478                                                                    | C <sub>18</sub> H <sub>31</sub> O <sub>3</sub> -NicA      |
| 23              | 8.33 | 514.2433 | 514.2435  | [M+H] <sup>+</sup> | C <sub>28</sub> H <sub>36</sub> O <sub>8</sub> N               | -0.473 | 124.0395,106.0291,313.1794,331.1899,436.2108,454.2225                                                  | C <sub>20</sub> H <sub>27</sub> O <sub>4</sub> -NicA-AcA  |
| 24 <sup>a</sup> | 8.38 | 488.2274 | 488.2279  | [M+H] <sup>+</sup> | C <sub>26</sub> H <sub>34</sub> O <sub>8</sub> N               | -1.011 | 124.0395,329.1743,347.1848                                                                             | C <sub>20</sub> H <sub>29</sub> O <sub>6</sub> -NicA      |
| 25 <sup>a</sup> | 8.43 | 516.2585 | 516.2592  | [M+H] <sup>+</sup> | C <sub>28</sub> H <sub>38</sub> O <sub>8</sub> N               | -1.343 | 124.0394,297.1841,315.1953,333.2069,420.2147,438.2270,456.2365                                         | C <sub>20</sub> H <sub>29</sub> O <sub>4</sub> -NicA-AcA  |
| 26              | 8.50 | 472.2328 | 472.2330  | [M+H] <sup>+</sup> | C <sub>26</sub> H <sub>34</sub> O <sub>7</sub> N               | -0.379 | 124.03944,313.17731,454.22015                                                                          | C <sub>20</sub> H <sub>29</sub> O <sub>5</sub> -NicA      |
| 27              | 8.57 | 575.2381 | 575.23879 | [M+H] <sup>+</sup> | C <sub>32</sub> H <sub>35</sub> O <sub>8</sub> N <sub>2</sub>  | -1.204 | 124.0395,293.1532,311.1638,416.1852,434.1958,452.2059,<br>539.2149,557.2290                            | C <sub>20</sub> H <sub>25</sub> O <sub>4</sub> -2NicA     |
| 28 <sup>a</sup> | 8.78 | 651.2531 | 651.2549  | [M+H] <sup>+</sup> | C <sub>34</sub> H <sub>39</sub> O <sub>11</sub> N <sub>2</sub> | -2.666 | 124.0394,291.1370,309.1484,327.1584,432.1794,450.1895,492.2016<br>,510.2094,555.2121,573.2220,633.2426 | C <sub>20</sub> H <sub>25</sub> O <sub>5</sub> -2NicA-AcA |
| 29              | 8.79 | 572.2479 | 572.2490  | [M+H] <sup>+</sup> | C <sub>30</sub> H <sub>38</sub> O <sub>10</sub> N              | -1.962 | 124.0394,293.1523,311.1635,329.1731,512.2258                                                           | C <sub>20</sub> H <sub>25</sub> O <sub>4</sub> -NicA-2AcA |
| 30 <sup>a</sup> | 8.82 | 512.2275 | 512.2279  | [M+H] <sup>+</sup> | C <sub>28</sub> H <sub>34</sub> O <sub>8</sub> N               | -0.768 | 124.0394,293.1518,311.1638,329.1751,452.2065                                                           | C <sub>20</sub> H <sub>25</sub> O <sub>4</sub> -NicA-AcA  |
| 31              | 8.83 | 472.2325 | 472.2330  | [M+H] <sup>+</sup> | C <sub>26</sub> H <sub>34</sub> O <sub>7</sub> N               | -1.014 | 124.0394,331.1911,472.2323                                                                             | C <sub>20</sub> H <sub>29</sub> O <sub>5</sub> -NicA      |
| 32              | 8.88 | 577.2538 | 577.2544  | [M+H] <sup>+</sup> | C <sub>32</sub> H <sub>37</sub> O <sub>8</sub> N <sub>2</sub>  | -1.113 | 124.0395,295.1691,313.1794,436.2113,454.2216                                                           | C <sub>20</sub> H <sub>27</sub> O <sub>4</sub> -2NicA     |
| 33              | 8.92 | 574.2632 | 574.2647  | [M+H] <sup>+</sup> | C <sub>30</sub> H <sub>40</sub> O <sub>10</sub> N              | -2.565 | 124.0395,295.1685,313.1799,436.2117,454.2242                                                           | C <sub>20</sub> H <sub>27</sub> O <sub>4</sub> -NicA-2AcA |
| 34              | 8.95 | 472.2324 | 472.2330  | [M+H] <sup>+</sup> | C <sub>26</sub> H <sub>34</sub> O <sub>7</sub> N               | -1.226 | 124.0395,313.1794,331.1895,349.2003                                                                    | C <sub>20</sub> H <sub>29</sub> O <sub>5</sub> -NicA      |
| 35              | 8.97 | 514.2432 | 514.2435  | [M+H] <sup>+</sup> | C <sub>28</sub> H <sub>36</sub> O <sub>8</sub> N               | -0.668 | 124.0395,295.1680,313.1802,331.1904,454.2220                                                           | C <sub>20</sub> H <sub>27</sub> O <sub>4</sub> -NicA-AcA  |
| 36              | 9.10 | 635.2583 | 635.2599  | [M+H] <sup>+</sup> | C <sub>34</sub> H <sub>39</sub> O <sub>10</sub> N <sub>2</sub> | -2.553 | 124.0395,293.1537,311.1637,329.1761,347.1848,416.1854,434.1954<br>,452.2026,557.2280,617.2488          | C <sub>20</sub> H <sub>25</sub> O <sub>4</sub> -2NicA-AcA |
| 37 <sup>a</sup> | 9.11 | 512.2271 | 512.2279  | [M+H] <sup>+</sup> | C <sub>28</sub> H <sub>34</sub> O <sub>8</sub> N               | -1.549 | 124.0395,293.1530,311.1633,329.1744,416.1857,434.1950,452.2062                                         | C <sub>20</sub> H <sub>25</sub> O <sub>4</sub> -NicA-AcA  |
| 38              | 9.12 | 574.2644 | 574.2647  | [M+H] <sup>+</sup> | C <sub>30</sub> H <sub>40</sub> O <sub>10</sub> N              | -0.475 | 124.0395,295.1688,313.1799,436.2122,454.2204                                                           | C <sub>20</sub> H <sub>27</sub> O <sub>4</sub> -NicA-2AcA |
| 39              | 9.19 | 575.2385 | 575.2388  | [M+H] <sup>+</sup> | C <sub>32</sub> H <sub>35</sub> O <sub>8</sub> N <sub>2</sub>  | -0.508 | 124.0395,311.1646,434.1973,452.2065                                                                    | C <sub>20</sub> H <sub>25</sub> O <sub>4</sub> -2NicA     |
| 40 <sup>a</sup> | 9.21 | 458.2531 | 458.2532  | [M+H] <sup>+</sup> | C <sub>26</sub> H <sub>36</sub> O <sub>6</sub> N               | -1.340 | 124.0395,281.1894,299.2001                                                                             | C <sub>20</sub> H <sub>31</sub> O <sub>4</sub> -NicA      |
| 41              | 9.22 | 572.2480 | 572.2490  | [M+H] <sup>+</sup> | C <sub>30</sub> H <sub>38</sub> O <sub>10</sub> N              | -1.787 | 124.0395,293.1528,311.1632,329.1733,452.0341,470.2144,530.2368                                         | C <sub>20</sub> H <sub>25</sub> O <sub>4</sub> -NicA-2AcA |
| 42              | 9.28 | 530.2377 | 530.2385  | [M+H] <sup>+</sup> | C <sub>28</sub> H <sub>36</sub> O <sub>9</sub> N               | -1.430 | 124.0394,329.1745,470.2209                                                                             | C <sub>20</sub> H <sub>27</sub> O <sub>5</sub> -NicA-AcA  |

|                 |      |          |          |                    |                                                               |        |                                                                                      |                                                           |
|-----------------|------|----------|----------|--------------------|---------------------------------------------------------------|--------|--------------------------------------------------------------------------------------|-----------------------------------------------------------|
| 43              | 9.30 | 514.2423 | 514.2435 | [M+H] <sup>+</sup> | C <sub>28</sub> H <sub>36</sub> O <sub>8</sub> N              | -2.418 | 124.0394,295.1696,313.1791,454.2220                                                  | C <sub>20</sub> H <sub>27</sub> O <sub>4</sub> -NicA-AcA  |
| 44              | 9.30 | 577.2536 | 577.2544 | [M+H] <sup>+</sup> | C <sub>32</sub> H <sub>37</sub> O <sub>8</sub> N <sub>2</sub> | -1.460 | 124.0395,295.1691,313.1785,331.1902,454.2234                                         | C <sub>20</sub> H <sub>27</sub> O <sub>4</sub> -2NicA     |
| 45              | 9.30 | 592.2534 | 592.2541 | [M+H] <sup>+</sup> | C <sub>33</sub> H <sub>38</sub> O <sub>9</sub> N              | -1.196 | 124.0394,105.0338,293.1535,311.1626,329.1740,<br>347.1853,470.2172                   | C <sub>20</sub> H <sub>27</sub> O <sub>5</sub> -NicA-BzA  |
| 46 <sup>a</sup> | 9.31 | 570.2320 | 570.2333 | [M+H] <sup>+</sup> | C <sub>30</sub> H <sub>36</sub> O <sub>10</sub> N             | -2.407 | 124.0394,291.1379,309.1478,327.1582,345.1689,450.1906,468.2010,<br>510.2166,528.2217 | C <sub>20</sub> H <sub>23</sub> O <sub>4</sub> -NicA-2AcA |
| 47              | 9.39 | 514.2428 | 514.2435 | [M+H] <sup>+</sup> | C <sub>28</sub> H <sub>36</sub> O <sub>8</sub> N              | -1.446 | 124.0395,295.1682,313.1798,331.1883,436.2110,454.2220                                | C <sub>20</sub> H <sub>27</sub> O <sub>4</sub> -NicA-AcA  |
| 48              | 9.41 | 572.2475 | 572.2490 | [M+H] <sup>+</sup> | C <sub>30</sub> H <sub>38</sub> O <sub>10</sub> N             | -2.661 | 124.0395,311.1638,329.1744,454.2202,512.2298                                         | C <sub>20</sub> H <sub>25</sub> O <sub>4</sub> -NicA-2AcA |
| 49 <sup>a</sup> | 9.42 | 528.2217 | 528.2228 | [M+H] <sup>+</sup> | C <sub>28</sub> H <sub>34</sub> O <sub>9</sub> N              | -2.098 | 124.0395,309.1480,327.1587,345.1680,450.1889,468.2019                                | C <sub>20</sub> H <sub>25</sub> O <sub>5</sub> -NicA-AcA  |
| 50              | 9.43 | 470.2180 | 470.2173 | [M+H] <sup>+</sup> | C <sub>26</sub> H <sub>32</sub> O <sub>7</sub> N              | 1.428  | 124.0394,311.1641,329.1740                                                           | C <sub>20</sub> H <sub>27</sub> O <sub>5</sub> -NicA      |
| 51              | 9.50 | 544.2523 | 544.2541 | [M+H] <sup>+</sup> | C <sub>29</sub> H <sub>38</sub> O <sub>9</sub> N              | -3.322 | 124.0394,293.1530,311.1635,329.1738,434.1978,452.2055                                | C <sub>20</sub> H <sub>25</sub> O <sub>4</sub> -NicA-X1   |
| 52              | 9.53 | 530.2371 | 530.2385 | [M+H] <sup>+</sup> | C <sub>28</sub> H <sub>36</sub> O <sub>9</sub> N              | -2.561 | 124.0394,293.1536,311.1685,329.1740,347.1837,434.1976,452.2048,<br>470.2163,512.2249 | C <sub>20</sub> H <sub>27</sub> O <sub>5</sub> -NicA-AcA  |
| 53              | 9.55 | 574.2430 | 574.2435 | [M+H] <sup>+</sup> | C <sub>33</sub> H <sub>36</sub> O <sub>8</sub> N              | -0.946 | 124.0395,105.0338,293.1538,311.1635,329.1751,434.1960,452.2114                       | C <sub>20</sub> H <sub>25</sub> O <sub>4</sub> -NicA-BzA  |
| 54              | 9.58 | 514.2429 | 514.2435 | [M+H] <sup>+</sup> | C <sub>28</sub> H <sub>36</sub> O <sub>8</sub> N              | -1.251 | 124.0393,295.1695,313.1790,436.2133,454.2233,496.2314                                | C <sub>20</sub> H <sub>27</sub> O <sub>4</sub> -NicA-AcA  |
| 55              | 9.64 | 456.2368 | 456.2381 | [M+H] <sup>+</sup> | C <sub>26</sub> H <sub>34</sub> O <sub>6</sub> N              | -2.771 | 124.0395,297.1843,315.1950                                                           | C <sub>20</sub> H <sub>29</sub> O <sub>4</sub> -NicA      |
| 56 <sup>a</sup> | 9.65 | 528.2217 | 528.2228 | [M+H] <sup>+</sup> | C <sub>28</sub> H <sub>34</sub> O <sub>9</sub> N              | -2.098 | 124.0394,309.1482,327.1602,345.1692,510.2106                                         | C <sub>20</sub> H <sub>25</sub> O <sub>5</sub> -NicA-AcA  |
| 57              | 9.66 | 544.2891 | 544.2905 | [M+H] <sup>+</sup> | C <sub>30</sub> H <sub>42</sub> O <sub>8</sub> N              | -2.561 | 124.0394,265.1945,283.2052,301.2157,406.2371,424.2474,484.2690                       | C <sub>20</sub> H <sub>29</sub> O <sub>2</sub> -NicA-2AcA |
| 58              | 9.68 | 510.2109 | 510.2122 | [M+H] <sup>+</sup> | C <sub>28</sub> H <sub>32</sub> O <sub>8</sub> N              | -2.633 | 124.0395,309.1475,327.1591,450.1902                                                  | C <sub>20</sub> H <sub>23</sub> O <sub>4</sub> -NicA-AcA  |
| 59              | 9.73 | 574.2430 | 574.2435 | [M+H] <sup>+</sup> | C <sub>33</sub> H <sub>36</sub> O <sub>8</sub> N              | -0.946 | 124.0395,105.0338,293.1548,311.1630,434.1968,452.2056                                | C <sub>20</sub> H <sub>25</sub> O <sub>4</sub> -NicA-BzA  |
| 60              | 9.75 | 544.2524 | 544.2541 | [M+H] <sup>+</sup> | C <sub>29</sub> H <sub>38</sub> O <sub>9</sub> N              | -3.139 | 124.0395,293.1530,311.1634,329.1756,<br>434.1953,452.2102,512.2271                   | C <sub>20</sub> H <sub>25</sub> O <sub>4</sub> -NicA-X1   |
| 61              | 9.78 | 514.2431 | 514.2435 | [M+H] <sup>+</sup> | C <sub>28</sub> H <sub>36</sub> O <sub>8</sub> N              | -0.862 | 124.0394,295.1690,313.1791,331.1900,454.2212                                         | C <sub>20</sub> H <sub>27</sub> O <sub>4</sub> -NicA-AcA  |
| 62              | 9.79 | 558.2692 | 558.2698 | [M+H] <sup>+</sup> | C <sub>30</sub> H <sub>40</sub> O <sub>9</sub> N              | -1.000 | 124.0394,293.1533,311.1630,329.1740,<br>434.1961,452.2065,470.2178                   | C <sub>20</sub> H <sub>27</sub> O <sub>5</sub> -NicA-A    |
| 63              | 9.81 | 572.2263 | 572.2279 | [M+H] <sup>+</sup> | C <sub>33</sub> H <sub>34</sub> O <sub>8</sub> N              | -2.785 | 124.0394,105.0338,291.1373,309.1480,327.1590,450.1890                                | C <sub>20</sub> H <sub>23</sub> O <sub>4</sub> -NicA-BzA  |

|                 |       |          |          |                    |                                                                |        |                                                                                               |                                                              |
|-----------------|-------|----------|----------|--------------------|----------------------------------------------------------------|--------|-----------------------------------------------------------------------------------------------|--------------------------------------------------------------|
| 64 <sup>a</sup> | 9.88  | 458.2176 | 458.2173 | [M+H] <sup>+</sup> | C <sub>25</sub> H <sub>32</sub> O <sub>7</sub> N               | 0.592  | 124.0395,257.1543,275.1641,398.1948                                                           | C <sub>17</sub> H <sub>23</sub> O <sub>3</sub> -NicA-AcA     |
| 65              | 9.89  | 530.2372 | 530.2385 | [M+H] <sup>+</sup> | C <sub>28</sub> H <sub>36</sub> O <sub>9</sub> N               | -2.373 | 124.0395,329.1721                                                                             | C <sub>20</sub> H <sub>27</sub> O <sub>5</sub> -NicA-AcA     |
| 66              | 9.90  | 454.2214 | 454.2224 | [M+H] <sup>+</sup> | C <sub>26</sub> H <sub>32</sub> O <sub>6</sub> N               | -2.233 | 124.0395                                                                                      | C <sub>20</sub> H <sub>27</sub> O <sub>4</sub> -NicA         |
| 67              | 9.92  | 572.2475 | 572.2490 | [M+H] <sup>+</sup> | C <sub>30</sub> H <sub>38</sub> O <sub>10</sub> N              | -2.661 | 124.0394,311.1636,329.1737,470.2213,530.2401                                                  | C <sub>20</sub> H <sub>25</sub> O <sub>4</sub> -NicA-2AcA    |
| 68 <sup>a</sup> | 9.96  | 458.2527 | 458.2537 | [M+H] <sup>+</sup> | C <sub>26</sub> H <sub>36</sub> O <sub>6</sub> N               | -2.213 | 124.0394,299.2006,317.2109,335.2209                                                           | C <sub>20</sub> H <sub>31</sub> O <sub>4</sub> -NicA         |
| 69              | 10.00 | 558.2684 | 558.2698 | [M+H] <sup>+</sup> | C <sub>30</sub> H <sub>40</sub> O <sub>9</sub> N               | -2.433 | 124.0395,279.1742,297.1845,315.1956,420.2170,438.2278                                         | C <sub>20</sub> H <sub>27</sub> O <sub>3</sub> -NicA-2AcA    |
| 70              | 10.06 | 593.2491 | 593.2494 | [M+H] <sup>+</sup> | C <sub>32</sub> H <sub>37</sub> O <sub>9</sub> N <sub>2</sub>  | -0.433 | 124.0395,293.1530,<br>311.1636,329.1743,347.1847,452.2068,470.2170                            | C <sub>20</sub> H <sub>27</sub> O <sub>5</sub> -2NicA        |
| 71              | 10.07 | 572.2283 | 572.2279 | [M+H] <sup>+</sup> | C <sub>33</sub> H <sub>34</sub> O <sub>8</sub> N               | 0.711  | 124.0395,105.0339,<br>291.1371,309.1483,327.1582,450.1881,512.2264                            | C <sub>20</sub> H <sub>23</sub> O <sub>4</sub> -NicA-BzA     |
| 72              | 10.07 | 635.2591 | 635.2599 | [M+H] <sup>+</sup> | C <sub>34</sub> H <sub>39</sub> O <sub>10</sub> N <sub>2</sub> | -1.294 | 124.0394,293.1529,311.1631,329.1749,347.1846,434.1949,452.2057,<br>512.2274,575.2385,617.2477 | C <sub>20</sub> H <sub>25</sub> O <sub>4</sub> -2NicA-AcA    |
| 73 <sup>a</sup> | 10.08 | 610.2648 | 610.2647 | [M+H] <sup>+</sup> | C <sub>33</sub> H <sub>40</sub> O <sub>10</sub> N              | 0.208  | 124.0395,309.1480,327.1579,450.1906,550.2419,568.2535                                         | C <sub>20</sub> H <sub>23</sub> O <sub>4</sub> -NicA-C       |
| 74 <sup>a</sup> | 10.09 | 546.3040 | 546.3061 | [M+H] <sup>+</sup> | C <sub>30</sub> H <sub>44</sub> O <sub>8</sub> N               | -3.924 | 124.0395,267.2100,285.2209,303.2312,408.2528,426.2633,486.2843                                | C <sub>20</sub> H <sub>31</sub> O <sub>2</sub> -NicA-2AcA    |
| 75 <sup>a</sup> | 10.09 | 502.2784 | 502.2799 | [M+H] <sup>+</sup> | C <sub>28</sub> H <sub>40</sub> O <sub>7</sub> N               | -3.044 | 124.0394,283.2054,301.2157,424.2480                                                           | C <sub>20</sub> H <sub>31</sub> O <sub>3</sub> -NicA-AcA     |
| 76 <sup>a</sup> | 10.10 | 648.2422 | 648.2439 | [M+H] <sup>+</sup> | C <sub>35</sub> H <sub>38</sub> O <sub>11</sub> N              | -2.680 | 105.0338,124.0395,138.0549,343.1530,466.1851,588.2217                                         | C <sub>20</sub> H <sub>23</sub> O <sub>5</sub> -NicA-BzA-AcA |
| 77              | 10.12 | 577.2544 | 577.2544 | [M+H] <sup>+</sup> | C <sub>32</sub> H <sub>37</sub> O <sub>8</sub> N <sub>2</sub>  | -0.074 | 124.0395,295.1666,313.1804,331.1906,454.2212                                                  | C <sub>20</sub> H <sub>27</sub> O <sub>4</sub> -2NicA        |
| 78 <sup>a</sup> | 10.13 | 528.2224 | 528.2228 | [M+H] <sup>+</sup> | C <sub>28</sub> H <sub>34</sub> O <sub>9</sub> N               | -0.772 | 124.0395,309.1462,327.1592,345.1681,468.1989                                                  | C <sub>20</sub> H <sub>25</sub> O <sub>5</sub> -NicA-AcA     |
| 79 <sup>a</sup> | 10.15 | 412.2116 | 412.2118 | [M+H] <sup>+</sup> | C <sub>24</sub> H <sub>30</sub> O <sub>5</sub> N               | -0.605 | 124.0395,253.1582,271.1692                                                                    | C <sub>18</sub> H <sub>25</sub> O <sub>3</sub> -NicA         |
| 80              | 10.15 | 574.2429 | 574.2435 | [M+H] <sup>+</sup> | C <sub>33</sub> H <sub>36</sub> O <sub>8</sub> N               | -1.121 | 124.0395,105.0338,293.1534,311.1629,434.1969,452.2045,                                        | C <sub>20</sub> H <sub>25</sub> O <sub>4</sub> -NicA-BzA     |
| 81              | 10.19 | 514.2430 | 514.2435 | [M+H] <sup>+</sup> | C <sub>28</sub> H <sub>36</sub> O <sub>8</sub> N               | -1.057 | 124.0395, 295.1696,313.1795,331.1909,436.2114,454.2208                                        | C <sub>20</sub> H <sub>27</sub> O <sub>4</sub> -NicA-AcA     |
| 82              | 10.24 | 454.2220 | 454.2224 | [M+H] <sup>+</sup> | C <sub>26</sub> H <sub>32</sub> O <sub>6</sub> N               | -0.912 | 124.0394,313.1800,331.1915                                                                    | C <sub>20</sub> H <sub>27</sub> O <sub>4</sub> -NicA         |
| 83 <sup>a</sup> | 10.24 | 528.2214 | 528.2228 | [M+H] <sup>+</sup> | C <sub>28</sub> H <sub>34</sub> O <sub>9</sub> N               | -2.668 | 124.0394                                                                                      | C <sub>20</sub> H <sub>25</sub> O <sub>5</sub> -NicA-AcA     |
| 84 <sup>a</sup> | 10.25 | 588.2786 | 588.2803 | [M+H] <sup>+</sup> | C <sub>31</sub> H <sub>42</sub> O <sub>10</sub> N              | -2.929 | 124.0395,295.1690,313.1794,331.1895,454.2217                                                  | C <sub>20</sub> H <sub>29</sub> O <sub>5</sub> - NicA-B      |
| 85 <sup>a</sup> | 10.26 | 438.2262 | 438.2275 | [M+H] <sup>+</sup> | C <sub>26</sub> H <sub>32</sub> O <sub>5</sub> N               | -2.966 | 124.0394                                                                                      | C <sub>20</sub> H <sub>27</sub> O <sub>3</sub> -NicA         |
| 86              | 10.34 | 558.2685 | 558.2698 | [M+H] <sup>+</sup> | C <sub>30</sub> H <sub>40</sub> O <sub>9</sub> N               | -2.254 | 124.0394,293.1532,311.1641,434.1968                                                           | C <sub>20</sub> H <sub>27</sub> O <sub>5</sub> -NicA-A       |

|                  |       |          |          |                    |                                                               |        |                                                                                                    |                                                            |
|------------------|-------|----------|----------|--------------------|---------------------------------------------------------------|--------|----------------------------------------------------------------------------------------------------|------------------------------------------------------------|
| 87 <sup>a</sup>  | 10.34 | 566.2383 | 566.2385 | [M+H] <sup>+</sup> | C <sub>31</sub> H <sub>36</sub> O <sub>9</sub> N              | -0.279 | 124.0395,309.1476,327.1574,432.1758,450.1901,468.2019                                              | C <sub>20</sub> H <sub>23</sub> O <sub>4</sub> -NicA-B     |
| 88               | 10.35 | 574.2435 | 574.2435 | [M+H] <sup>+</sup> | C <sub>33</sub> H <sub>36</sub> O <sub>8</sub> N              | -0.076 | 124.0395,105.0338,293.1538,311.1636,434.1957                                                       | C <sub>20</sub> H <sub>25</sub> O <sub>4</sub> -NicA-BzA   |
| 89               | 10.36 | 470.2170 | 470.2173 | [M+H] <sup>+</sup> | C <sub>26</sub> H <sub>32</sub> O <sub>7</sub> N              | -0.699 | 124.0395,311.1643,329.1731                                                                         | C <sub>20</sub> H <sub>27</sub> O <sub>5</sub> -NicA       |
| 90               | 10.39 | 440.2424 | 440.2431 | [M+H] <sup>+</sup> | C <sub>26</sub> H <sub>34</sub> O <sub>5</sub> N              | -1.703 | 124.0395,299.2011,317.2101                                                                         | C <sub>20</sub> H <sub>29</sub> O <sub>3</sub> -NicA       |
| 91               | 10.41 | 514.2432 | 514.2435 | [M+H] <sup>+</sup> | C <sub>28</sub> H <sub>36</sub> O <sub>8</sub> N              | -0.668 | 124.0394,295.1686,313.1802,331.1903,454.2216                                                       | C <sub>20</sub> H <sub>27</sub> O <sub>4</sub> -NicA-AcA   |
| 92               | 10.43 | 456.2372 | 456.2381 | [M+H] <sup>+</sup> | C <sub>26</sub> H <sub>34</sub> O <sub>6</sub> N              | -1.894 | 124.0395,297.1849,315.1951                                                                         | C <sub>20</sub> H <sub>29</sub> O <sub>4</sub> -NicA       |
| 93               | 10.45 | 575.2389 | 575.2388 | [M+H] <sup>+</sup> | C <sub>32</sub> H <sub>35</sub> O <sub>8</sub> N <sub>2</sub> | 0.183  | 124.0395,293.1538,311.1636,329.1742,434.1954,452.2067                                              | C <sub>20</sub> H <sub>25</sub> O <sub>4</sub> -2NicA      |
| 94               | 10.45 | 572.2253 | 572.2279 | [M+H] <sup>+</sup> | C <sub>33</sub> H <sub>34</sub> O <sub>8</sub> N              | -2.435 | 124.0395,105.0338,291.1372,309.1482,327.1595,450.1901                                              | C <sub>20</sub> H <sub>23</sub> O <sub>4</sub> -NicA-BzA   |
| 95               | 10.47 | 530.2382 | 530.2385 | [M+H] <sup>+</sup> | C <sub>28</sub> H <sub>36</sub> O <sub>9</sub> N              | -0.478 | 124.0395,311.1646,329.1758                                                                         | C <sub>20</sub> H <sub>27</sub> O <sub>5</sub> -NicA-AcA   |
| 96               | 10.49 | 556.2526 | 556.2541 | [M+H] <sup>+</sup> | C <sub>30</sub> H <sub>38</sub> O <sub>9</sub> N              | -2.711 | 124.0395,295.1681,313.1786,436.0740                                                                | C <sub>20</sub> H <sub>25</sub> O <sub>3</sub> -NicA-2AcA  |
| 97               | 10.54 | 577.2537 | 577.2544 | [M+H] <sup>+</sup> | C <sub>32</sub> H <sub>37</sub> O <sub>8</sub> N <sub>2</sub> | -1.286 | 124.0394,295.1691,313.1792,436.2114,454.2213                                                       | C <sub>20</sub> H <sub>27</sub> O <sub>4</sub> -2NicA      |
| 98 <sup>a</sup>  | 10.56 | 412.2116 | 412.2118 | [M+H] <sup>+</sup> | C <sub>24</sub> H <sub>30</sub> O <sub>5</sub> N              | -0.605 | 124.0394,293.2104                                                                                  | C <sub>18</sub> H <sub>25</sub> O <sub>3</sub> -NicA       |
| 99               | 10.56 | 530.2379 | 530.2385 | [M+H] <sup>+</sup> | C <sub>28</sub> H <sub>36</sub> O <sub>9</sub> N              | -1.053 | 124.0395,329.1719,347.1842                                                                         | C <sub>20</sub> H <sub>27</sub> O <sub>5</sub> -NicA-AcA   |
| 100 <sup>a</sup> | 10.57 | 588.2793 | 588.2803 | [M+H] <sup>+</sup> | C <sub>31</sub> H <sub>42</sub> O <sub>10</sub> N             | -1.793 | 124.0395,345.2056,327.1950,309.1852,450.2250,468.2372,528.2568                                     | C <sub>21</sub> H <sub>29</sub> O <sub>4</sub> - NicA-2AcA |
| 101              | 10.61 | 592.2536 | 592.2541 | [M+H] <sup>+</sup> | C <sub>33</sub> H <sub>38</sub> O <sub>9</sub> N              | -0.858 | 124.0395,105.0338,311.1694,329.1742,452.2067,470.2172                                              | C <sub>20</sub> H <sub>27</sub> O <sub>5</sub> -NicA-BzA   |
| 102              | 10.66 | 552.2590 | 552.2592 | [M+H] <sup>+</sup> | C <sub>31</sub> H <sub>38</sub> O <sub>8</sub> N              | -0.350 | 124.0395,295.1689,313.1795,331.1898,418.2014,436.2094,454.2215                                     | C <sub>20</sub> H <sub>25</sub> O <sub>3</sub> - NicA-B    |
| 103 <sup>a</sup> | 10.67 | 570.2689 | 570.2698 | [M+H] <sup>+</sup> | C <sub>31</sub> H <sub>40</sub> O <sub>9</sub> N              | -1.505 | 124.0395,295.1688,313.1801,331.1896,418.2024,436.2113,534.2487,552.2591                            | C <sub>20</sub> H <sub>27</sub> O <sub>4</sub> -NicA-B     |
| 104 <sup>a</sup> | 10.67 | 500.2642 | 500.2643 | [M+H] <sup>+</sup> | C <sub>28</sub> H <sub>38</sub> O <sub>7</sub> N              | -0.158 | 124.0394,281.1894,299.1999,317.2109,422.2328,440.2406                                              | C <sub>20</sub> H <sub>29</sub> O <sub>3</sub> - NicA-AcA  |
| 105              | 10.70 | 544.2521 | 544.2541 | [M+H] <sup>+</sup> | C <sub>29</sub> H <sub>38</sub> O <sub>9</sub> N              | -3.690 | 124.0394,293.1535,311.1632,329.1732,434.1937,452.2073                                              | C <sub>20</sub> H <sub>25</sub> O <sub>4</sub> -NicA-X1    |
| 106 <sup>a</sup> | 10.71 | 512.2265 | 512.2279 | [M+H] <sup>+</sup> | C <sub>28</sub> H <sub>34</sub> O <sub>8</sub> N              | -2.720 | 124.0394,311.1630                                                                                  | C <sub>20</sub> H <sub>25</sub> O <sub>4</sub> -NicA-AcA   |
| 107              | 10.72 | 595.2632 | 595.2650 | [M+H] <sup>+</sup> | C <sub>32</sub> H <sub>39</sub> O <sub>9</sub> N <sub>2</sub> | -3.306 | 124.0395,271.1689,394.2001,472.2322,517.2340,577.2510                                              | C <sub>18</sub> H <sub>25</sub> O <sub>3</sub> - 2NicA-AcA |
| 108              | 10.74 | 556.2537 | 556.2541 | [M+H] <sup>+</sup> | C <sub>30</sub> H <sub>38</sub> O <sub>9</sub> N              | -0.374 | 124.0395,295.1688,313.1796,331.1907,436.0633,496.2327                                              | C <sub>20</sub> H <sub>25</sub> O <sub>3</sub> -NicA-2AcA  |
| 109              | 10.76 | 575.2374 | 575.2388 | [M+H] <sup>+</sup> | C <sub>32</sub> H <sub>35</sub> O <sub>8</sub> N <sub>2</sub> | -2.421 | 124.0395,311.1633,329.1743,452.2060                                                                | C <sub>20</sub> H <sub>25</sub> O <sub>4</sub> -2NicA      |
| 110 <sup>a</sup> | 10.76 | 614.2957 | 614.2960 | [M+H] <sup>+</sup> | C <sub>33</sub> H <sub>44</sub> O <sub>10</sub> N             | -0.444 | 124.0394,295.1688,313.1794,331.1897,418.2003,436.2106,454.2212,536.2637,554.2755,578.2749,596.2849 | C <sub>20</sub> H <sub>27</sub> O <sub>4</sub> -NicA-C     |

|                  |       |          |          |                    |                                                                |        |                                                                                                    |                                                              |
|------------------|-------|----------|----------|--------------------|----------------------------------------------------------------|--------|----------------------------------------------------------------------------------------------------|--------------------------------------------------------------|
| 111 <sup>a</sup> | 10.78 | 570.2686 | 570.2698 | [M+H] <sup>+</sup> | C <sub>31</sub> H <sub>40</sub> O <sub>9</sub> N               | -2.031 | 124.0395,313.1783                                                                                  | C <sub>20</sub> H <sub>27</sub> O <sub>4</sub> -NicA-B       |
| 112              | 10.78 | 596.2852 | 596.2854 | [M+H] <sup>+</sup> | C <sub>33</sub> H <sub>42</sub> O <sub>9</sub> N               | -0.349 | 124.0394,295.1687,313.1789,331.1918,418.2024,436.2113,454.2224,536.2641,554.2774,578.2745,596.2852 | C <sub>20</sub> H <sub>25</sub> O <sub>3</sub> -NicA-C       |
| 113              | 10.81 | 514.2427 | 514.2435 | [M+H] <sup>+</sup> | C <sub>28</sub> H <sub>36</sub> O <sub>8</sub> N               | -1.640 | 124.0395,295.1687,313.1796,331.1796,436.2141,496.2346                                              | C <sub>20</sub> H <sub>27</sub> O <sub>4</sub> -NicA-AcA     |
| 114              | 10.85 | 633.2434 | 633.2443 | [M+H] <sup>+</sup> | C <sub>34</sub> H <sub>37</sub> O <sub>10</sub> N <sub>2</sub> | -1.377 | 124.0395,291.1361,309.1483,327.1587,432.1807,450.1895,492.2028,510.2094,555.2115,573.2230          | C <sub>20</sub> H <sub>23</sub> O <sub>4</sub> -2NicA-AcA    |
| 115              | 10.85 | 572.2468 | 572.2490 | [M+H] <sup>+</sup> | C <sub>30</sub> H <sub>38</sub> O <sub>10</sub> N              | -3.884 | 124.0395,293.1535,311.1634,329.1742,434.2003,452.2078,512.2267                                     | C <sub>20</sub> H <sub>25</sub> O <sub>4</sub> -NicA-2AcA    |
| 116              | 10.86 | 592.2536 | 592.2541 | [M+H] <sup>+</sup> | C <sub>33</sub> H <sub>38</sub> O <sub>9</sub> N               | -0.858 | 124.0395,105.0338,311.1631,329.1745,434.1955,452.2055,470.2160                                     | C <sub>20</sub> H <sub>27</sub> O <sub>5</sub> -NicA-BzA     |
| 117              | 10.86 | 554.2372 | 554.2385 | [M+H] <sup>+</sup> | C <sub>30</sub> H <sub>36</sub> O <sub>9</sub> N               | -2.270 | 124.0394,293.1529,311.1635,329.1742,434.1972,452.2051,512.2227                                     | C <sub>20</sub> H <sub>23</sub> O <sub>3</sub> -NicA-2AcA    |
| 118 <sup>a</sup> | 10.89 | 512.2238 | 512.2279 | [M+H] <sup>+</sup> | C <sub>28</sub> H <sub>34</sub> O <sub>8</sub> N               | -7.991 | 124.0394,293.1534,311.1642,329.1742,347.1835,452.2102                                              | C <sub>20</sub> H <sub>25</sub> O <sub>4</sub> -NicA-AcA     |
| 119              | 10.91 | 514.2429 | 514.2435 | [M+H] <sup>+</sup> | C <sub>28</sub> H <sub>36</sub> O <sub>8</sub> N               | -1.251 | 124.0394,295.1692,313.1790,331.1906,454.2190                                                       | C <sub>20</sub> H <sub>27</sub> O <sub>4</sub> -NicA-AcA     |
| 120 <sup>a</sup> | 10.91 | 616.2518 | 616.2541 | [M+H] <sup>+</sup> | C <sub>35</sub> H <sub>38</sub> O <sub>9</sub> N               | -3.745 | 124.0394,105.0338,293.1528,311.1636,329.1748,434.1940,556.2518                                     | C <sub>20</sub> H <sub>23</sub> O <sub>3</sub> -NicA-BzA-AcA |
| 121 <sup>a</sup> | 10.93 | 570.2673 | 570.2698 | [M+H] <sup>+</sup> | C <sub>31</sub> H <sub>40</sub> O <sub>9</sub> N               | -4.311 | 124.0395,295.1687,313.1798,331.1896,418.2024,552.2589                                              | C <sub>20</sub> H <sub>27</sub> O <sub>4</sub> -NicA-B       |
| 122              | 10.93 | 635.2588 | 635.2599 | [M+H] <sup>+</sup> | C <sub>34</sub> H <sub>39</sub> O <sub>10</sub> N <sub>2</sub> | -1.766 | 124.0394,293.1528,311.1636,329.1741,347.1877,434.1957,452.2058,512.2209,557.2263,575.2375,617.2477 | C <sub>20</sub> H <sub>25</sub> O <sub>4</sub> -2NicA-AcA    |
| 123              | 10.94 | 559.2436 | 559.2439 | [M+H] <sup>+</sup> | C <sub>32</sub> H <sub>35</sub> O <sub>7</sub> N <sub>2</sub>  | -0.497 | 124.0395,295.1690,313.1794,436.2113                                                                | C <sub>20</sub> H <sub>25</sub> O <sub>3</sub> -2NicA        |
| 124              | 10.95 | 440.2442 | 440.2431 | [M+H] <sup>+</sup> | C <sub>26</sub> H <sub>34</sub> O <sub>5</sub> N               | 2.386  | 124.0395,299.2002                                                                                  | C <sub>20</sub> H <sub>29</sub> O <sub>3</sub> -NicA         |
| 125              | 10.96 | 574.2418 | 574.2435 | [M+H] <sup>+</sup> | C <sub>33</sub> H <sub>36</sub> O <sub>8</sub> N               | -3.036 | 124.0395,105.0338,293.1525,311.1635,329.1747,416.1854,434.1943                                     | C <sub>20</sub> H <sub>25</sub> O <sub>4</sub> -NicA-BzA     |
| 126              | 10.99 | 592.2531 | 592.2541 | [M+H] <sup>+</sup> | C <sub>33</sub> H <sub>38</sub> O <sub>9</sub> N               | -1.702 | 124.0395,105.0338,311.1644,329.1747,434.1974,452.2062,470.2170                                     | C <sub>20</sub> H <sub>27</sub> O <sub>5</sub> -NicA-BzA     |
| 127              | 11.02 | 514.2432 | 514.2435 | [M+H] <sup>+</sup> | C <sub>28</sub> H <sub>36</sub> O <sub>8</sub> N               | -0.668 | 124.0395,313.1811,331.1909,373.1990                                                                | C <sub>20</sub> H <sub>27</sub> O <sub>4</sub> -NicA-AcA     |
| 128              | 11.02 | 619.2639 | 619.2650 | [M+H] <sup>+</sup> | C <sub>34</sub> H <sub>39</sub> O <sub>9</sub> N <sub>2</sub>  | -1.768 | 124.0395,295.1689,313.1811,436.2144,454.2220,496.2325,577.2540                                     | C <sub>20</sub> H <sub>25</sub> O <sub>3</sub> -2NicA-AcA    |
| 129              | 11.06 | 574.2430 | 574.2435 | [M+H] <sup>+</sup> | C <sub>33</sub> H <sub>36</sub> O <sub>8</sub> N               | -0.946 | 124.0394,105.0338,311.1633,329.1749,452.2061,434.1943                                              | C <sub>20</sub> H <sub>25</sub> O <sub>4</sub> -NicA-BzA     |
| 130 <sup>a</sup> | 11.09 | 588.2780 | 588.2803 | [M+H] <sup>+</sup> | C <sub>31</sub> H <sub>42</sub> O <sub>10</sub> N              | -0.039 | 124.0395,345.2052,327.1954,309.1844,450.2254,468.2385,528.2568                                     | C <sub>21</sub> H <sub>29</sub> O <sub>4</sub> -NicA-2AcA    |

|                  |       |          |          |                    |                                                               |        |                                                                                                |                                                              |
|------------------|-------|----------|----------|--------------------|---------------------------------------------------------------|--------|------------------------------------------------------------------------------------------------|--------------------------------------------------------------|
| 131              | 11.14 | 440.2435 | 440.2431 | [M+H] <sup>+</sup> | C <sub>26</sub> H <sub>34</sub> O <sub>5</sub> N              | 0.796  | 124.0395,299.2004                                                                              | C <sub>20</sub> H <sub>29</sub> O <sub>3</sub> -NicA         |
| 132              | 11.16 | 557.2275 | 557.2282 | [M+H] <sup>+</sup> | C <sub>32</sub> H <sub>33</sub> O <sub>7</sub> N <sub>2</sub> | -1.306 | 124.0395,293.1531,311.1635,434.1954                                                            | C <sub>20</sub> H <sub>25</sub> O <sub>3</sub> -2NicA        |
| 133              | 11.16 | 576.2582 | 576.2592 | [M+H] <sup>+</sup> | C <sub>33</sub> H <sub>38</sub> O <sub>8</sub> N              | -1.724 | 124.0395,105.0338,295.1687,313.1793,331.1898,558.2471                                          | C <sub>20</sub> H <sub>27</sub> O <sub>4</sub> -NicA-BzA     |
| 134              | 11.18 | 530.2750 | 530.2748 | [M+H] <sup>+</sup> | C <sub>29</sub> H <sub>40</sub> O <sub>8</sub> N              | 0.259  | 124.03945,297.1844,315.1948,438.2264,470.2530                                                  | C <sub>20</sub> H <sub>27</sub> O <sub>3</sub> -NicA-X1      |
| 135 <sup>a</sup> | 11.20 | 570.2689 | 570.2698 | [M+H] <sup>+</sup> | C <sub>31</sub> H <sub>40</sub> O <sub>9</sub> N              | -1.505 | 124.0395,295.1689,313.1795,331.1915,418.2010,436.2118,454.2238,<br>,552.2576,534.2488          | C <sub>20</sub> H <sub>27</sub> O <sub>4</sub> -NicA-B       |
| 136              | 11.20 | 682.2751 | 682.2759 | [M+H] <sup>+</sup> | C <sub>38</sub> H <sub>40</sub> O <sub>9</sub> N <sub>3</sub> | -1.182 | 124.0394,295.1689,313.1791,436.2100,559.2431                                                   | C <sub>20</sub> H <sub>25</sub> O <sub>3</sub> -3NicA        |
| 137              | 11.23 | 456.2387 | 456.2381 | [M+H] <sup>+</sup> | C <sub>26</sub> H <sub>34</sub> O <sub>6</sub> N              | 1.394  | 124.0395,297.1850,315.1955,438.2239                                                            | C <sub>20</sub> H <sub>29</sub> O <sub>4</sub> -NicA         |
| 138              | 11.27 | 556.2526 | 556.2541 | [M+H] <sup>+</sup> | C <sub>30</sub> H <sub>38</sub> O <sub>9</sub> N              | -2.711 | 124.0394,295.1689,313.1788,514.2420                                                            | C <sub>20</sub> H <sub>25</sub> O <sub>3</sub> -NicA-2AcA    |
| 139 <sup>a</sup> | 11.30 | 570.2674 | 570.2698 | [M+H] <sup>+</sup> | C <sub>31</sub> H <sub>40</sub> O <sub>9</sub> N              | -4.135 | 124.0395,295.1687,313.1798,436.2122,552.2586                                                   | C <sub>20</sub> H <sub>27</sub> O <sub>4</sub> -NicA-B       |
| 140              | 11.32 | 496.2322 | 496.2330 | [M+H] <sup>+</sup> | C <sub>28</sub> H <sub>34</sub> O <sub>7</sub> N              | -1.569 | 124.0394,295.1688,313.1796,331.1901,436.2120                                                   | C <sub>20</sub> H <sub>25</sub> O <sub>3</sub> -NicA-AcA     |
| 141              | 11.33 | 514.2413 | 514.2435 | [M+H] <sup>+</sup> | C <sub>28</sub> H <sub>36</sub> O <sub>8</sub> N              | -4.363 | 124.0395,295.1677,313.1793,331.1887,468.1963,514.2435                                          | C <sub>20</sub> H <sub>27</sub> O <sub>4</sub> -NicA-AcA     |
| 142              | 11.34 | 456.2374 | 456.2381 | [M+H] <sup>+</sup> | C <sub>26</sub> H <sub>34</sub> O <sub>6</sub> N              | -1.456 | 124.0394,297.1837,315.1952,333.2046                                                            | C <sub>20</sub> H <sub>29</sub> O <sub>4</sub> -NicA         |
| 143              | 11.34 | 680.2596 | 680.2603 | [M+H] <sup>+</sup> | C <sub>38</sub> H <sub>38</sub> O <sub>9</sub> N <sub>3</sub> | -0.965 | 124.0395,293.1523,311.1632,434.1954,557.2277,                                                  | C <sub>20</sub> H <sub>25</sub> O <sub>3</sub> -3NicA        |
| 144              | 11.35 | 576.2587 | 576.2592 | [M+H] <sup>+</sup> | C <sub>33</sub> H <sub>38</sub> O <sub>8</sub> N              | -0.856 | 124.0395,105.0338,295.1694,313.1796,331.1902,454.2269                                          | C <sub>20</sub> H <sub>27</sub> O <sub>4</sub> -NicA-BzA     |
| 145              | 11.38 | 568.2531 | 568.2541 | [M+H] <sup>+</sup> | C <sub>31</sub> H <sub>38</sub> O <sub>9</sub> N              | -1.774 | 124.0395,293.1535,311.1637,329.1745,<br>,452.2070,532.2409,550.2794                            | C <sub>20</sub> H <sub>25</sub> O <sub>4</sub> -NicA-B       |
| 146 <sup>a</sup> | 11.39 | 452.2063 | 452.2068 | [M+H] <sup>+</sup> | C <sub>26</sub> H <sub>30</sub> O <sub>6</sub> N              | -1.026 | 124.0395                                                                                       | C <sub>20</sub> H <sub>25</sub> O <sub>4</sub> -NicA         |
| 147              | 11.44 | 574.2433 | 574.2435 | [M+H] <sup>+</sup> | C <sub>33</sub> H <sub>36</sub> O <sub>8</sub> N              | -0.424 | 124.0394,105.0338,311.1633                                                                     | C <sub>20</sub> H <sub>25</sub> O <sub>4</sub> -NicA-BzA     |
| 148              | 11.47 | 559.2426 | 559.2439 | [M+H] <sup>+</sup> | C <sub>32</sub> H <sub>35</sub> O <sub>7</sub> N <sub>2</sub> | -2.285 | 124.0394,295.1680,313.1785,436.2110                                                            | C <sub>20</sub> H <sub>25</sub> O <sub>3</sub> -2NicA        |
| 149              | 11.47 | 556.2537 | 556.2541 | [M+H] <sup>+</sup> | C <sub>30</sub> H <sub>38</sub> O <sub>9</sub> N              | -0.734 | 124.0394,295.1698,313.1795,331.1895,454.2236,496.2310,514.2515                                 | C <sub>20</sub> H <sub>25</sub> O <sub>3</sub> -NicA-2AcA    |
| 150 <sup>a</sup> | 11.49 | 570.2697 | 570.2698 | [M+H] <sup>+</sup> | C <sub>31</sub> H <sub>40</sub> O <sub>9</sub> N              | -0.102 | 124.0395,295.1690,313.1787,552.2604                                                            | C <sub>20</sub> H <sub>27</sub> O <sub>4</sub> -NicA-B       |
| 151 <sup>a</sup> | 11.49 | 628.2726 | 628.2752 | [M+H] <sup>+</sup> | C <sub>33</sub> H <sub>42</sub> O <sub>11</sub> N             | -4.918 | 124.0394,329.1746,512.2247                                                                     | C <sub>20</sub> H <sub>25</sub> O <sub>4</sub> -NicA-AcA-B   |
| 152 <sup>a</sup> | 11.50 | 442.2580 | 442.2588 | [M+H] <sup>+</sup> | C <sub>26</sub> H <sub>36</sub> O <sub>5</sub> N              | -1.808 | 124.0394,283.2051,301.2158,424.2476                                                            | C <sub>20</sub> H <sub>31</sub> O <sub>3</sub> -NicA         |
| 153              | 11.54 | 634.2630 | 634.2647 | [M+H] <sup>+</sup> | C <sub>35</sub> H <sub>40</sub> O <sub>10</sub> N             | -2.637 | 124.0394,105.0338,293.1523,311.1631,329.1740,347.1838,434.1932,<br>,512.2233,556.2323,616.2516 | C <sub>20</sub> H <sub>25</sub> O <sub>4</sub> -NicA-BzA-AcA |

|                  |       |          |          |                    |                                                               |        |                                                                         |                                                           |
|------------------|-------|----------|----------|--------------------|---------------------------------------------------------------|--------|-------------------------------------------------------------------------|-----------------------------------------------------------|
| 154              | 11.56 | 554.2369 | 554.2385 | [M+H] <sup>+</sup> | C <sub>30</sub> H <sub>36</sub> O <sub>9</sub> N              | -2.811 | 124.0395,293.1526,311.1631,329.1736,434.1957,452.2038,494.2216,512.2233 | C <sub>20</sub> H <sub>23</sub> O <sub>3</sub> -NicA-2AcA |
| 155 <sup>a</sup> | 11.57 | 438.2264 | 438.2275 | [M+H] <sup>+</sup> | C <sub>26</sub> H <sub>32</sub> O <sub>5</sub> N              | -2.509 | 124.0395,297.1852,315.1952                                              | C <sub>20</sub> H <sub>27</sub> O <sub>3</sub> -NicA      |
| 156 <sup>a</sup> | 11.60 | 542.2740 | 542.2748 | [M+H] <sup>+</sup> | C <sub>30</sub> H <sub>40</sub> O <sub>8</sub> N              | -1.556 | 124.0395,295.1685,313.1791,331.1895,436.2494,454.2194,482.2539          | C <sub>20</sub> H <sub>27</sub> O <sub>4</sub> -NicA-A    |
| 157              | 11.61 | 530.2753 | 530.2748 | [M+H] <sup>+</sup> | C <sub>29</sub> H <sub>40</sub> O <sub>8</sub> N              | 0.861  | 124.0394,297.1844,315.1954,420.2166,438.2272                            | C <sub>20</sub> H <sub>27</sub> O <sub>3</sub> -NicA-X1   |
| 158              | 11.61 | 561.2590 | 561.2595 | [M+H] <sup>+</sup> | C <sub>32</sub> H <sub>37</sub> O <sub>7</sub> N <sub>2</sub> | -0.941 | 124.0395,297.1843,315.1949,420.2156,438.2266,543.2510                   | C <sub>20</sub> H <sub>27</sub> O <sub>3</sub> -2NicA     |
| 159 <sup>a</sup> | 11.65 | 534.2485 | 534.2486 | [M+H] <sup>+</sup> | C <sub>31</sub> H <sub>36</sub> O <sub>7</sub> N              | -0.129 | 124.0395,105.0338                                                       | C <sub>18</sub> H <sub>25</sub> O <sub>3</sub> -NicA-BzA  |
| 160              | 11.71 | 682.2742 | 682.2759 | [M+H] <sup>+</sup> | C <sub>38</sub> H <sub>40</sub> O <sub>9</sub> N <sub>3</sub> | -2.501 | 124.0395,295.1689,313.1796,436.2127,559.2426                            | C <sub>20</sub> H <sub>25</sub> O <sub>3</sub> -3NicA     |
| 161              | 11.72 | 619.2645 | 619.2650 | [M+H] <sup>+</sup> | C <sub>34</sub> H <sub>39</sub> O <sub>9</sub> N <sub>2</sub> | -0.819 | 124.0395,295.1691,313.1793,436.2106,454.2250,496.2325,559.2361          | C <sub>20</sub> H <sub>25</sub> O <sub>3</sub> -2NicA-AcA |
| 162 <sup>a</sup> | 11.75 | 570.2687 | 570.2698 | [M+H] <sup>+</sup> | C <sub>31</sub> H <sub>40</sub> O <sub>9</sub> N              | -1.856 | 124.0395,295.1688,313.1793,331.1899,436.2109,454.3622,552.2585          | C <sub>20</sub> H <sub>27</sub> O <sub>4</sub> -NicA-B    |
| 163              | 11.76 | 554.2755 | 554.2748 | [M+H] <sup>+</sup> | C <sub>31</sub> H <sub>40</sub> O <sub>8</sub> N              | 1.184  | 124.0395,295.1692,313.1795,331.1895,418.2042,436.2114,536.2663          | C <sub>20</sub> H <sub>27</sub> O <sub>4</sub> -NicA-X2   |
| 164 <sup>a</sup> | 11.80 | 498.2487 | 498.2486 | [M+H] <sup>+</sup> | C <sub>28</sub> H <sub>36</sub> O <sub>7</sub> N              | 0.143  | 124.0395,297.1847,315.1953                                              | C <sub>20</sub> H <sub>27</sub> O <sub>3</sub> -NicA-AcA  |
| 165              | 11.81 | 576.2585 | 576.2592 | [M+H] <sup>+</sup> | C <sub>33</sub> H <sub>38</sub> O <sub>8</sub> N              | -1.204 | 124.0394,105.0338,295.1691,313.1790,331.1894,418.2014,436.2063,454.2219 | C <sub>20</sub> H <sub>27</sub> O <sub>4</sub> -NicA-BzA  |
| 166 <sup>a</sup> | 11.86 | 542.2740 | 542.2748 | [M+H] <sup>+</sup> | C <sub>30</sub> H <sub>40</sub> O <sub>8</sub> N              | -1.556 | 124.0394,313.1788,454.2215                                              | C <sub>20</sub> H <sub>27</sub> O <sub>4</sub> -NicA-A    |
| 167              | 11.90 | 556.2899 | 556.2905 | [M+H] <sup>+</sup> | C <sub>31</sub> H <sub>42</sub> O <sub>8</sub> N              | -1.067 | 124.0394,297.1841,315.1949,420.2153,438.2267,538.2813                   | C <sub>20</sub> H <sub>29</sub> O <sub>4</sub> -NicA-X2   |
| 168              | 11.91 | 619.2645 | 619.2650 | [M+H] <sup>+</sup> | C <sub>34</sub> H <sub>39</sub> O <sub>9</sub> N <sub>2</sub> | -0.819 | 124.0395,295.1687,313.1794,418.2037,436.2116,454.2215,496.2312,559.2423 | C <sub>20</sub> H <sub>25</sub> O <sub>3</sub> -2NicA-AcA |
| 169              | 11.91 | 576.2587 | 576.2592 | [M+H] <sup>+</sup> | C <sub>33</sub> H <sub>38</sub> O <sub>8</sub> N              | -0.856 | 124.0395,313.1801,331.1903                                              | C <sub>20</sub> H <sub>27</sub> O <sub>4</sub> -NicA-BzA  |
| 170 <sup>a</sup> | 11.92 | 570.2696 | 570.2698 | [M+H] <sup>+</sup> | C <sub>31</sub> H <sub>40</sub> O <sub>9</sub> N              | -0.227 | 124.0395,295.1685,313.1795,331.1896,454.2225,552.2587                   | C <sub>20</sub> H <sub>27</sub> O <sub>4</sub> -NicA-B    |
| 171 <sup>a</sup> | 11.96 | 553.2421 | 553.2432 | [M+H] <sup>+</sup> | C <sub>31</sub> H <sub>37</sub> O <sub>9</sub>                | -2.005 | 105.0339,293.1532,311.1637,329.1741,433.2011                            | C <sub>20</sub> H <sub>23</sub> O <sub>3</sub> -BzA-2AcA  |
| 172 <sup>a</sup> | 11.99 | 498.2477 | 498.2486 | [M+H] <sup>+</sup> | C <sub>28</sub> H <sub>36</sub> O <sub>7</sub> N              | -1.864 | 124.0394,297.1852,315.1945,438.2282                                     | C <sub>20</sub> H <sub>27</sub> O <sub>3</sub> -NicA-AcA  |
| 173              | 11.99 | 561.2573 | 561.2595 | [M+H] <sup>+</sup> | C <sub>32</sub> H <sub>37</sub> O <sub>7</sub> N <sub>2</sub> | -3.969 | 124.0395,297.1835,315.1960,438.2274                                     | C <sub>20</sub> H <sub>27</sub> O <sub>3</sub> -2NicA     |
| 174              | 12.03 | 556.2531 | 556.2541 | [M+H] <sup>+</sup> | C <sub>30</sub> H <sub>38</sub> O <sub>9</sub> N              | -1.812 | 124.0395,297.1852,315.1952,420.438.2252                                 | C <sub>20</sub> H <sub>29</sub> O <sub>4</sub> -NicA-X2   |
| 175              | 12.05 | 496.2325 | 496.2330 | [M+H] <sup>+</sup> | C <sub>28</sub> H <sub>34</sub> O <sub>7</sub> N              | -0.965 | 124.0395,295.1688,313.1931,436.2136                                     | C <sub>20</sub> H <sub>25</sub> O <sub>3</sub> -NicA-AcA  |
| 176              | 12.07 | 552.2585 | 552.2592 | [M+H] <sup>+</sup> | C <sub>31</sub> H <sub>38</sub> O <sub>8</sub> N              | -1.256 | 124.0395,295.1689,313.1792,436.2115,454.2212                            | C <sub>20</sub> H <sub>25</sub> O <sub>3</sub> -NicA-B    |

|                  |       |          |          |                    |                                                               |        |                                                                                                    |                                                              |
|------------------|-------|----------|----------|--------------------|---------------------------------------------------------------|--------|----------------------------------------------------------------------------------------------------|--------------------------------------------------------------|
| 177              | 12.09 | 556.2526 | 556.2541 | [M+H] <sup>+</sup> | C <sub>30</sub> H <sub>38</sub> O <sub>9</sub> N              | -2.711 | 124.0394,297.1847,315.1945,420.2128,438.2284                                                       | C <sub>20</sub> H <sub>29</sub> O <sub>4</sub> -NicA-X2      |
| 178              | 12.09 | 576.2587 | 576.2592 | [M+H] <sup>+</sup> | C <sub>33</sub> H <sub>38</sub> O <sub>8</sub> N              | -0.856 | 124.0394,295.1683,313.1785,331.1898,436.2094,454.2209                                              | C <sub>20</sub> H <sub>27</sub> O <sub>4</sub> -NicA-BzA     |
| 179              | 12.11 | 619.2645 | 619.2650 | [M+H] <sup>+</sup> | C <sub>34</sub> H <sub>39</sub> O <sub>9</sub> N <sub>2</sub> | -0.819 | 124.0395,295.1684,313.1794,436.2134,496.2330                                                       | C <sub>20</sub> H <sub>25</sub> O <sub>3</sub> -2NicA-AcA    |
| 180 <sup>a</sup> | 12.13 | 598.2630 | 598.2647 | [M+H] <sup>+</sup> | C <sub>32</sub> H <sub>40</sub> O <sub>10</sub> N             | -2.796 | 124.0395,309.1477,327.1582,450.1894,510.2135,557.2551                                              | C <sub>20</sub> H <sub>23</sub> O <sub>4</sub> -NicA-AcA-A   |
| 181 <sup>a</sup> | 12.15 | 570.2692 | 570.2698 | [M+H] <sup>+</sup> | C <sub>31</sub> H <sub>40</sub> O <sub>9</sub> N              | -0.979 | 124.0395,295.1689,313.1787,331.1917,436.2118,552.2593                                              | C <sub>20</sub> H <sub>27</sub> O <sub>4</sub> -NicA-B       |
| 182 <sup>a</sup> | 12.15 | 614.2955 | 614.2960 | [M+H] <sup>+</sup> | C <sub>33</sub> H <sub>44</sub> O <sub>10</sub> N             | -0.770 | 124.0395,295.1687,313.1793,331.1900,418.2007,436.2120,454.2202,554.2720,572.2849,596.2850          | C <sub>20</sub> H <sub>27</sub> O <sub>4</sub> -NicA-C       |
| 183              | 12.20 | 576.2592 | 576.2592 | [M+H] <sup>+</sup> | C <sub>33</sub> H <sub>38</sub> O <sub>8</sub> N              | 0.011  | 124.0394,295.1687,313.1795,331.1896,436.2100                                                       | C <sub>20</sub> H <sub>27</sub> O <sub>4</sub> -NicA-BzA     |
| 184 <sup>a</sup> | 12.24 | 600.2794 | 600.2803 | [M+H] <sup>+</sup> | C <sub>32</sub> H <sub>42</sub> O <sub>10</sub> N             | -1.537 | 124.0394,293.1542,311.1636,329.1743,347.1843,434.2002,452.2059,470.2159,512.2280,540.2589,582.2725 | C <sub>20</sub> H <sub>25</sub> O <sub>4</sub> -NicA-AcA-A   |
| 185              | 12.24 | 556.2886 | 556.2905 | [M+H] <sup>+</sup> | C <sub>31</sub> H <sub>42</sub> O <sub>8</sub> N              | -3.404 | 124.0395,297.1845,315.1957,438.2238,538.2886                                                       | C <sub>20</sub> H <sub>29</sub> O <sub>4</sub> -NicA-X2      |
| 186 <sup>a</sup> | 12.25 | 582.2695 | 582.2698 | [M+H] <sup>+</sup> | C <sub>32</sub> H <sub>40</sub> O <sub>9</sub> N              | -0.443 | 124.0394,293.1534,311.1637,329.1742,434.1963,452.2059,470.2188,512.2273,540.2569                   | C <sub>20</sub> H <sub>23</sub> O <sub>3</sub> -NicA-AcA-A   |
| 187              | 12.26 | 561.2590 | 561.2595 | [M+H] <sup>+</sup> | C <sub>32</sub> H <sub>37</sub> O <sub>7</sub> N <sub>2</sub> | -0.941 | 124.0394,297.1843,315.1948,438.2270                                                                | C <sub>20</sub> H <sub>27</sub> O <sub>3</sub> -2NicA        |
| 188              | 12.26 | 619.2642 | 619.2650 | [M+H] <sup>+</sup> | C <sub>34</sub> H <sub>39</sub> O <sub>9</sub> N <sub>2</sub> | -1.303 | 124.0395,295.1678,313.1794,436.2113,454.2178,496.2327,559.2434,601.2766                            | C <sub>20</sub> H <sub>25</sub> O <sub>3</sub> -2NicA-AcA    |
| 189 <sup>a</sup> | 12.27 | 512.2269 | 512.2279 | [M+H] <sup>+</sup> | C <sub>28</sub> H <sub>34</sub> O <sub>8</sub> N              | -1.939 | 124.0394,293.1528,311.1635,329.1741,347.1864,452.2057,470.2157                                     | C <sub>20</sub> H <sub>25</sub> O <sub>4</sub> -NicA-AcA     |
| 190 <sup>a</sup> | 12.28 | 498.2482 | 498.2486 | [M+H] <sup>+</sup> | C <sub>28</sub> H <sub>36</sub> O <sub>7</sub> N              | -0.861 | 124.0395,297.1845,315.1948,420.2169,438.2280                                                       | C <sub>20</sub> H <sub>27</sub> O <sub>3</sub> -NicA-AcA     |
| 191              | 12.29 | 544.2896 | 544.2905 | [M+H] <sup>+</sup> | C <sub>30</sub> H <sub>42</sub> O <sub>8</sub> N              | -1.642 | 124.0394,297.1851,315.1946,420.2163,438.2268                                                       | C <sub>20</sub> H <sub>27</sub> O <sub>3</sub> -NicA-X3      |
| 192              | 12.30 | 584.2848 | 584.2854 | [M+H] <sup>+</sup> | C <sub>32</sub> H <sub>42</sub> O <sub>9</sub> N              | -1.041 | 124.0395,295.1685,313.1788,331.1883,454.2151,514.2390                                              | C <sub>20</sub> H <sub>25</sub> O <sub>3</sub> -NicA-AcA-A   |
| 193              | 12.32 | 524.2643 | 524.2643 | [M+H] <sup>+</sup> | C <sub>30</sub> H <sub>38</sub> O <sub>7</sub> N              | 0.040  | 124.0395,295.1692,313.1789,331.1891,436.2119,454.2215                                              | C <sub>20</sub> H <sub>25</sub> O <sub>3</sub> -NicA-A       |
| 194              | 12.33 | 576.2589 | 576.2592 | [M+H] <sup>+</sup> | C <sub>33</sub> H <sub>38</sub> O <sub>8</sub> N              | -0.509 | 124.0394,295.1689,313.1795,331.1916,436.2103,454.2225,558.2589                                     | C <sub>20</sub> H <sub>27</sub> O <sub>4</sub> -NicA-BzA     |
| 195              | 12.34 | 530.2743 | 530.2748 | [M+H] <sup>+</sup> | C <sub>29</sub> H <sub>40</sub> O <sub>8</sub> N              | -1.025 | 124.0394,311.1997,329.2105,347.2211,470.2506,498.2465,438.2301,297.1843,315.1946                   | C <sub>21</sub> H <sub>31</sub> O <sub>4</sub> -NicA-AcA     |
| 196 <sup>a</sup> | 12.37 | 594.2687 | 594.2698 | [M+H] <sup>+</sup> | C <sub>33</sub> H <sub>40</sub> O <sub>9</sub> N              | -1.781 | 124.0394,105.0338,289.1792,271.1687,253.1582,393.2070,516.2355                                     | C <sub>18</sub> H <sub>25</sub> O <sub>3</sub> -NicA-BzA-AcA |
| 197              | 12.39 | 514.2434 | 514.2435 | [M+H] <sup>+</sup> | C <sub>28</sub> H <sub>36</sub> O <sub>8</sub> N              | -0.279 | 124.0395                                                                                           | C <sub>20</sub> H <sub>27</sub> O <sub>4</sub> -NicA-AcA     |



|                  |       |          |          |                    |                                                               |        |                                                                                                    |                                                              |
|------------------|-------|----------|----------|--------------------|---------------------------------------------------------------|--------|----------------------------------------------------------------------------------------------------|--------------------------------------------------------------|
| 198              | 12.39 | 559.2432 | 559.2439 | [M+H] <sup>+</sup> | C <sub>32</sub> H <sub>35</sub> O <sub>7</sub> N <sub>2</sub> | -1.212 | 124.0394,295.1687,313.1792,436.2111                                                                | C <sub>20</sub> H <sub>25</sub> O <sub>3</sub> -2NicA        |
| 199 <sup>a</sup> | 12.42 | 545.2636 | 545.2646 | [M+H] <sup>+</sup> | C <sub>32</sub> H <sub>37</sub> O <sub>6</sub> N <sub>2</sub> | -1.858 | 124.0394,299.1998,422.2310                                                                         | C <sub>20</sub> H <sub>27</sub> O <sub>2</sub> -2NicA        |
| 200 <sup>a</sup> | 12.43 | 498.2410 | 498.2486 | [M+H] <sup>+</sup> | C <sub>28</sub> H <sub>36</sub> O <sub>7</sub> N              | -0.058 | 124.0394,297.1835,315.1947,438.2260                                                                | C <sub>20</sub> H <sub>27</sub> O <sub>3</sub> -NicA-AcA     |
| 201              | 12.45 | 561.2591 | 561.2595 | [M+H] <sup>+</sup> | C <sub>32</sub> H <sub>37</sub> O <sub>7</sub> N <sub>2</sub> | -0.762 | 124.0394,297.1848,315.1950,438.2273                                                                | C <sub>20</sub> H <sub>27</sub> O <sub>3</sub> -2NicA        |
| 202              | 12.47 | 554.2740 | 554.2748 | [M+H] <sup>+</sup> | C <sub>31</sub> H <sub>40</sub> O <sub>8</sub> N              | -1.522 | 124.0395,297.1848,315.1947,420.2173                                                                | C <sub>20</sub> H <sub>27</sub> O <sub>3</sub> -NicA-B       |
| 203              | 12.51 | 559.2433 | 559.2439 | [M+H] <sup>+</sup> | C <sub>32</sub> H <sub>35</sub> O <sub>7</sub> N <sub>2</sub> | -1.033 | 124.0394,295.1686,313.1794,436.2119                                                                | C <sub>20</sub> H <sub>25</sub> O <sub>3</sub> -2NicA        |
| 204              | 12.51 | 634.2642 | 634.2647 | [M+H] <sup>+</sup> | C <sub>35</sub> H <sub>40</sub> O <sub>10</sub> N             | -0.745 | 105.0338,124.0394,293.1533,311.1641,329.1745,347.1838,434.1962,452.2054,512.2277,574.2429,616.2516 | C <sub>20</sub> H <sub>25</sub> O <sub>4</sub> -NicA-BzA-AcA |
| 205              | 12.52 | 574.2429 | 574.2435 | [M+H] <sup>+</sup> | C <sub>33</sub> H <sub>36</sub> O <sub>8</sub> N              | -1.121 | 124.0394,105.0337,293.1535,311.1642,329.1735,452.2045                                              | C <sub>20</sub> H <sub>25</sub> O <sub>4</sub> -NicA-BzA     |
| 206 <sup>a</sup> | 12.55 | 647.2940 | 647.2963 | [M+H] <sup>+</sup> | C <sub>36</sub> H <sub>43</sub> O <sub>9</sub> N <sub>2</sub> | -3.565 | 124.0394,295.1680,313.1792,436.2093,454.2213,524.2637,577.2538                                     | C <sub>20</sub> H <sub>25</sub> O <sub>3</sub> -2NicA-A      |
| 207              | 12.56 | 556.2532 | 556.2541 | [M+H] <sup>+</sup> | C <sub>30</sub> H <sub>38</sub> O <sub>9</sub> N              | -1.633 | 124.0395,295.1688,313.1797,331.1874,436.2136                                                       | C <sub>20</sub> H <sub>25</sub> O <sub>3</sub> -NicA-2AcA    |
| 208 <sup>a</sup> | 12.58 | 570.2689 | 570.2698 | [M+H] <sup>+</sup> | C <sub>31</sub> H <sub>40</sub> O <sub>9</sub> N              | -1.505 | 124.0395,295.1685,313.1795,454.2220,552.2614                                                       | C <sub>20</sub> H <sub>27</sub> O <sub>4</sub> -NicA-B       |
| 209              | 12.60 | 576.2587 | 576.2592 | [M+H] <sup>+</sup> | C <sub>33</sub> H <sub>38</sub> O <sub>8</sub> N              | -0.856 | 124.0395,295.1696,313.1791,331.1901,436.2132,454.2244,558.2469,105.0338                            | C <sub>20</sub> H <sub>27</sub> O <sub>4</sub> -NicA-BzA     |
| 210              | 12.63 | 552.2587 | 552.2592 | [M+H] <sup>+</sup> | C <sub>31</sub> H <sub>38</sub> O <sub>8</sub> N              | -0.894 | 124.0394,295.1689,313.1794,331.1901,436.2108,454.2246                                              | C <sub>20</sub> H <sub>25</sub> O <sub>3</sub> -NicA-B       |
| 211 <sup>a</sup> | 12.66 | 511.2313 | 511.2326 | [M+H] <sup>+</sup> | C <sub>29</sub> H <sub>35</sub> O <sub>8</sub>                | -2.630 | 105.0338,293.1533,311.1641,329.1742,347.1866                                                       | C <sub>20</sub> H <sub>25</sub> O <sub>4</sub> -BzA-AcA      |
| 212              | 12.67 | 496.2316 | 496.2330 | [M+H] <sup>+</sup> | C <sub>28</sub> H <sub>34</sub> O <sub>7</sub> N              | -2.779 | 124.0394,295.1693,313.1791,331.1902,436.2118,454.2221                                              | C <sub>20</sub> H <sub>25</sub> O <sub>3</sub> -NicA-AcA     |
| 213 <sup>a</sup> | 12.67 | 632.2482 | 632.2490 | [M+H] <sup>+</sup> | C <sub>35</sub> H <sub>38</sub> O <sub>10</sub> N             | -1.301 | 124.0395,105.0338,309.1479,327.1589,572.2279                                                       | C <sub>20</sub> H <sub>23</sub> O <sub>4</sub> -NicA-BzA-AcA |
| 214              | 12.68 | 556.2533 | 556.2541 | [M+H] <sup>+</sup> | C <sub>30</sub> H <sub>38</sub> O <sub>9</sub> N              | -1.453 | 124.0394,295.1695,313.1792,331.1903,373.2005,496.2324                                              | C <sub>20</sub> H <sub>25</sub> O <sub>3</sub> -NicA-2AcA    |
| 215 <sup>a</sup> | 12.70 | 540.2956 | 540.2956 | [M+H] <sup>+</sup> | C <sub>31</sub> H <sub>42</sub> O <sub>7</sub> N              | 0.039  | 124.0395,281.1890,299.2003,422.2320                                                                | C <sub>20</sub> H <sub>29</sub> O <sub>3</sub> -NicA-X2      |
| 216              | 12.71 | 584.2848 | 584.2854 | [M+H] <sup>+</sup> | C <sub>32</sub> H <sub>42</sub> O <sub>9</sub> N              | -1.041 | 124.0395,295.1687,313.1796,331.1904,454.2234,496.2337                                              | C <sub>20</sub> H <sub>25</sub> O <sub>3</sub> -NicA-AcA-A   |
| 217              | 12.75 | 544.2892 | 544.2905 | [M+H] <sup>+</sup> | C <sub>30</sub> H <sub>42</sub> O <sub>8</sub> N              | -2.377 | 124.0394,297.1845,315.1955,420.2128,438.2273                                                       | C <sub>20</sub> H <sub>27</sub> O <sub>3</sub> -NicA-X3      |
| 218              | 12.76 | 634.2640 | 634.2647 | [M+H] <sup>+</sup> | C <sub>35</sub> H <sub>40</sub> O <sub>10</sub> N             | -1.061 | 105.0338,124.0394,293.1533,311.1634,329.1740,347.1838,433.2009,452.2039,556.2287,574.2449,616.2546 | C <sub>20</sub> H <sub>25</sub> O <sub>4</sub> -NicA-BzA-AcA |
| 219              | 12.79 | 524.2640 | 524.2643 | [M+H] <sup>+</sup> | C <sub>30</sub> H <sub>38</sub> O <sub>7</sub> N              | -0.532 | 124.0395,295.1681,313.1795,331.1898,436.2116,454.2226                                              | C <sub>20</sub> H <sub>25</sub> O <sub>3</sub> -NicA-A       |
| 220              | 12.79 | 493.2206 | 493.2221 | [M+H] <sup>+</sup> | C <sub>29</sub> H <sub>33</sub> O <sub>7</sub>                | -3.000 | 105.0339,293.1530,311.1619                                                                         | C <sub>20</sub> H <sub>23</sub> O <sub>3</sub> -BzA-AcA      |

|                  |       |          |          |                    |                                                               |        |                                                                                                    |                                                              |
|------------------|-------|----------|----------|--------------------|---------------------------------------------------------------|--------|----------------------------------------------------------------------------------------------------|--------------------------------------------------------------|
| 221 <sup>a</sup> | 12.79 | 512.2264 | 512.2279 | [M+H] <sup>+</sup> | C <sub>28</sub> H <sub>34</sub> O <sub>8</sub> N              | -2.916 | 124.0395,293.1556,311.1635,329.1746,452.2057,470.2195                                              | C <sub>20</sub> H <sub>25</sub> O <sub>4</sub> -NicA-AcA     |
| 222              | 12.80 | 576.2589 | 576.2592 | [M+H] <sup>+</sup> | C <sub>33</sub> H <sub>38</sub> O <sub>8</sub> N              | -0.509 | 124.0395,313.1791,454.2181,105.0338                                                                | C <sub>20</sub> H <sub>27</sub> O <sub>4</sub> -NicA-BzA     |
| 223              | 12.81 | 470.2169 | 470.2173 | [M+H] <sup>+</sup> | C <sub>26</sub> H <sub>32</sub> O <sub>7</sub> N              | -0.912 | 124.0394,293.1543,311.1645,329.1742,347.1848,452.2090                                              | C <sub>20</sub> H <sub>27</sub> O <sub>5</sub> -NicA         |
| 224              | 12.83 | 596.2834 | 596.2854 | [M+H] <sup>+</sup> | C <sub>33</sub> H <sub>42</sub> O <sub>9</sub> N              | -3.368 | 124.0394,295.1687,313.1794,418.2000,436.2109,454.2209,554.2738,578.2789                            | C <sub>20</sub> H <sub>25</sub> O <sub>3</sub> -NicA-C       |
| 225 <sup>a</sup> | 12.84 | 672.3004 | 672.3015 | [M+H] <sup>+</sup> | C <sub>35</sub> H <sub>46</sub> O <sub>12</sub> N             | -1.565 | 124.0395,293.1531,311.1637,329.1743,434.1945,452.2062,494.2160,512.2271,594.2693,612.2816,654.2895 | C <sub>20</sub> H <sub>25</sub> O <sub>4</sub> -NicA-AcA-C   |
| 226 <sup>a</sup> | 12.87 | 647.2957 | 647.2963 | [M+H] <sup>+</sup> | C <sub>36</sub> H <sub>43</sub> O <sub>9</sub> N <sub>2</sub> | -0.938 | 124.0394,295.1690,313.1792,436.2098,454.2270,559.2423                                              | C <sub>20</sub> H <sub>25</sub> O <sub>3</sub> -2NicA-A      |
| 227              | 12.91 | 618.2688 | 618.2698 | [M+H] <sup>+</sup> | C <sub>35</sub> H <sub>40</sub> O <sub>9</sub> N              | -1.550 | 124.0394,105.0338,295.1687,313.1792,436.2122,558.2483                                              | C <sub>20</sub> H <sub>25</sub> O <sub>3</sub> -NicA-BzA-AcA |
| 228              | 12.92 | 558.2485 | 558.2486 | [M+H] <sup>+</sup> | C <sub>33</sub> H <sub>36</sub> O <sub>7</sub> N              | -0.231 | 124.0395,105.0338,295.1683,313.1800,436.2124                                                       | C <sub>20</sub> H <sub>25</sub> O <sub>3</sub> -NicA-BzA     |
| 229 <sup>a</sup> | 12.96 | 452.2065 | 452.2068 | [M+H] <sup>+</sup> | C <sub>26</sub> H <sub>30</sub> O <sub>6</sub> N              | -0.584 | 124.0395,293.1534,311.1651,329.1743                                                                | C <sub>20</sub> H <sub>25</sub> O <sub>4</sub> -NicA         |
| 230              | 12.96 | 470.2163 | 470.2173 | [M+H] <sup>+</sup> | C <sub>26</sub> H <sub>32</sub> O <sub>7</sub> N              | -2.188 | 124.0394,293.1538,329.1741,347.1848,452.2054                                                       | C <sub>20</sub> H <sub>27</sub> O <sub>5</sub> -NicA         |
| 231 <sup>a</sup> | 12.98 | 570.2672 | 570.2698 | [M+H] <sup>+</sup> | C <sub>31</sub> H <sub>40</sub> O <sub>9</sub> N              | -4.486 | 124.0395,295.1687,313.1794,331.1898,436.2110,454.2285,552.2607                                     | C <sub>20</sub> H <sub>27</sub> O <sub>4</sub> -NicA-B       |
| 232              | 12.99 | 592.2540 | 592.2541 | [M+H] <sup>+</sup> | C <sub>33</sub> H <sub>38</sub> O <sub>9</sub> N              | -0.183 | 124.0394,293.1530,329.1744,452.2067                                                                | C <sub>20</sub> H <sub>27</sub> O <sub>5</sub> -NicA-BzA     |
| 233 <sup>a</sup> | 13.01 | 482.2531 | 482.2537 | [M+H] <sup>+</sup> | C <sub>28</sub> H <sub>36</sub> O <sub>6</sub> N              | -1.274 | 124.0395,299.2002,317.2105                                                                         | C <sub>20</sub> H <sub>27</sub> O <sub>2</sub> -NicA-AcA     |
| 234 <sup>a</sup> | 13.03 | 659.2957 | 659.2963 | [M+H] <sup>+</sup> | C <sub>37</sub> H <sub>43</sub> O <sub>9</sub> N <sub>2</sub> | -0.921 | 124.0394,295.1683,313.1790,418.1998,436.2098,518.2516,536.2629,641.2849                            | C <sub>20</sub> H <sub>25</sub> O <sub>3</sub> -2NicA-X2     |
| 235 <sup>a</sup> | 13.07 | 498.2480 | 498.2486 | [M+H] <sup>+</sup> | C <sub>28</sub> H <sub>36</sub> O <sub>7</sub> N              | -1.262 | 124.0394,297.1841,315.1951,438.2279                                                                | C <sub>20</sub> H <sub>27</sub> O <sub>3</sub> -NicA-AcA     |
| 236              | 13.07 | 556.2319 | 556.2330 | [M+H] <sup>+</sup> | C <sub>33</sub> H <sub>34</sub> O <sub>7</sub> N              | -1.940 | 124.0394,105.0338,293.1527,311.1636,434.1960                                                       | C <sub>20</sub> H <sub>23</sub> O <sub>3</sub> -NicA-BzA     |
| 237              | 13.10 | 576.2601 | 576.2592 | [M+H] <sup>+</sup> | C <sub>33</sub> H <sub>38</sub> O <sub>8</sub> N              | 1.573  | 124.0394,105.0338,295.1689,313.1793,331.1890,454.2237                                              | C <sub>20</sub> H <sub>27</sub> O <sub>4</sub> -NicA-BzA     |
| 238 <sup>a</sup> | 13.10 | 650.2589 | 650.2596 | [M+H] <sup>+</sup> | C <sub>35</sub> H <sub>40</sub> O <sub>11</sub> N             | -1.057 | 124.0395,293.1529,311.1635,329.1743,347.1844,452.2058,470.2174,512.2281,530.2382,572.2325,590.2366 | C <sub>20</sub> H <sub>25</sub> O <sub>5</sub> -NicA-BzA-AcA |
| 239 <sup>a</sup> | 13.11 | 436.2110 | 436.2118 | [M+H] <sup>+</sup> | C <sub>26</sub> H <sub>30</sub> O <sub>5</sub> N              | -1.947 | 124.0395,295.1696,313.1792                                                                         | C <sub>20</sub> H <sub>25</sub> O <sub>3</sub> -NicA         |
| 240 <sup>a</sup> | 13.14 | 628.2746 | 628.2752 | [M+H] <sup>+</sup> | C <sub>33</sub> H <sub>42</sub> O <sub>11</sub> N             | -1.015 | 124.0395,311.1640,329.1741,347.1849,434.1971,452.2068,550.2440,568.2532,610.2574                   | C <sub>20</sub> H <sub>25</sub> O <sub>4</sub> -NicA-AcA-B   |
| 241              | 13.14 | 681.2798 | 681.2807 | [M+H] <sup>+</sup> | C <sub>39</sub> H <sub>41</sub> O <sub>9</sub> N <sub>2</sub> | -1.258 | 124.0394,295.1694,313.1792,436.2098,558.2481                                                       | C <sub>20</sub> H <sub>25</sub> O <sub>3</sub> -2NicA-BzA    |

|                  |       |          |          |                    |                                                   |        |                                                                                                             |                                                              |
|------------------|-------|----------|----------|--------------------|---------------------------------------------------|--------|-------------------------------------------------------------------------------------------------------------|--------------------------------------------------------------|
| 242 <sup>a</sup> | 13.18 | 438.2264 | 438.2275 | [M+H] <sup>+</sup> | C <sub>26</sub> H <sub>32</sub> O <sub>5</sub> N  | -2.509 | 124.0394,315.1949                                                                                           | C <sub>20</sub> H <sub>27</sub> O <sub>3</sub> -NicA         |
| 243              | 13.19 | 574.2432 | 574.2435 | [M+H] <sup>+</sup> | C <sub>33</sub> H <sub>36</sub> O <sub>8</sub> N  | -0.598 | 124.0394,105.0337,293.1531,311.1633,329.1739,436.2106,452.2188,556.2317                                     | C <sub>20</sub> H <sub>25</sub> O <sub>4</sub> -NicA-BzA     |
| 244              | 13.20 | 552.2584 | 552.2592 | [M+H] <sup>+</sup> | C <sub>31</sub> H <sub>38</sub> O <sub>8</sub> N  | -1.437 | 124.0394,295.1685,313.1791,418.1975,436.2091                                                                | C <sub>20</sub> H <sub>25</sub> O <sub>3</sub> -NicA-B       |
| 245              | 13.25 | 584.2837 | 584.2854 | [M+H] <sup>+</sup> | C <sub>32</sub> H <sub>42</sub> O <sub>9</sub> N  | -2.924 | 124.0394,295.1687,313.1792,331.1901,418.2051,436.2113,454.2215,496.2323,514.2446,566.2745                   | C <sub>20</sub> H <sub>25</sub> O <sub>3</sub> -NicA-AcA-A   |
| 246 <sup>a</sup> | 13.27 | 542.2743 | 542.2748 | [M+H] <sup>+</sup> | C <sub>30</sub> H <sub>40</sub> O <sub>8</sub> N  | -1.002 | 124.0394,313.1831,494.2291                                                                                  | C <sub>20</sub> H <sub>27</sub> O <sub>4</sub> -NicA-A       |
| 247              | 13.28 | 634.2640 | 634.2647 | [M+H] <sup>+</sup> | C <sub>35</sub> H <sub>40</sub> O <sub>10</sub> N | -1.061 | 105.0338,124.0394,293.1528,311.1633,329.1742,434.1943,452.2044,494.2131,512.2264,556.2327,574.2410,616.2527 | C <sub>20</sub> H <sub>25</sub> O <sub>4</sub> -NicA-BzA-AcA |
| 248              | 13.30 | 596.2843 | 596.2854 | [M+H] <sup>+</sup> | C <sub>33</sub> H <sub>42</sub> O <sub>9</sub> N  | -1.859 | 124.0394,295.1688,313.1793,418.2026,436.2110,454.2196,536.2673,554.2712,578.2740                            | C <sub>20</sub> H <sub>25</sub> O <sub>3</sub> -NicA-C       |
| 249 <sup>a</sup> | 13.30 | 612.2783 | 612.2803 | [M+H] <sup>+</sup> | C <sub>33</sub> H <sub>42</sub> O <sub>10</sub> N | -3.304 | 124.0394,295.1689,313.1794,331.1900,436.2111,454.2212,552.2568,570.2720                                     | C <sub>20</sub> H <sub>27</sub> O <sub>4</sub> -NicA-B       |
| 250 <sup>a</sup> | 13.34 | 632.2498 | 632.2490 | [M+H] <sup>+</sup> | C <sub>35</sub> H <sub>38</sub> O <sub>10</sub> N | 1.229  | 124.0394,105.0338,309.1483,327.1587,432.1815,450.1901,554.2148,572.2280,614.2379                            | C <sub>20</sub> H <sub>25</sub> O <sub>4</sub> -NicA-BzA-AcA |
| 251              | 13.36 | 584.2848 | 584.2854 | [M+H] <sup>+</sup> | C <sub>32</sub> H <sub>42</sub> O <sub>9</sub> N  | -1.041 | 124.0394,295.1684,313.1795,331.1894,436.2119,454.2211,496.2331,524.2746                                     | C <sub>20</sub> H <sub>25</sub> O <sub>3</sub> -NicA-AcA-A   |
| 252              | 13.37 | 558.2483 | 558.2486 | [M+H] <sup>+</sup> | C <sub>33</sub> H <sub>36</sub> O <sub>7</sub> N  | -0.589 | 124.0395,105.0338,295.1680,313.1796,436.2107                                                                | C <sub>20</sub> H <sub>25</sub> O <sub>3</sub> -NicA-BzA     |
| 253              | 13.41 | 576.2568 | 576.2592 | [M+H] <sup>+</sup> | C <sub>33</sub> H <sub>38</sub> O <sub>8</sub> N  | -4.154 | 124.0394,105.0338,295.1688,313.1797,331.1907,436.2125,454.2209                                              | C <sub>20</sub> H <sub>27</sub> O <sub>4</sub> -NicA-BzA     |
| 254              | 13.43 | 634.2623 | 634.2647 | [M+H] <sup>+</sup> | C <sub>35</sub> H <sub>40</sub> O <sub>10</sub> N | -0.588 | 105.0338,124.0394,293.1526,311.1635,329.1743,434.1956,452.2068,494.2186,512.2263,556.2325,574.2429,616.2540 | C <sub>20</sub> H <sub>25</sub> O <sub>4</sub> -NicA-BzA-AcA |
| 255 <sup>a</sup> | 13.43 | 550.2429 | 550.2435 | [M+H] <sup>+</sup> | C <sub>31</sub> H <sub>36</sub> O <sub>8</sub> N  | -1.169 | 124.0394,293.1519,311.1641,500.2429                                                                         | C <sub>20</sub> H <sub>25</sub> O <sub>3</sub> -NicA-B       |
| 256              | 13.49 | 554.2744 | 554.2748 | [M+H] <sup>+</sup> | C <sub>31</sub> H <sub>40</sub> O <sub>8</sub> N  | -0.800 | 124.0395,297.1847,315.1948,420.2172,438.2269,436.2682                                                       | C <sub>20</sub> H <sub>27</sub> O <sub>3</sub> -NicA-B       |
| 257              | 13.51 | 576.2585 | 576.2592 | [M+H] <sup>+</sup> | C <sub>33</sub> H <sub>38</sub> O <sub>8</sub> N  | -1.204 | 124.0395,105.0337,295.1688,313.1794,331.1894,436.2113,454.2225                                              | C <sub>20</sub> H <sub>27</sub> O <sub>4</sub> -NicA-BzA     |
| 258 <sup>a</sup> | 13.55 | 560.2637 | 560.2643 | [M+H] <sup>+</sup> | C <sub>33</sub> H <sub>38</sub> O <sub>7</sub> N  | -1.033 | 124.0395,105.0338,297.1844,315.1952,420.2145,438.2270,542.2549                                              | C <sub>20</sub> H <sub>27</sub> O <sub>3</sub> -NicA-BzA     |
| 259 <sup>a</sup> | 13.59 | 612.2781 | 612.2803 | [M+H] <sup>+</sup> | C <sub>33</sub> H <sub>42</sub> O <sub>10</sub> N | -3.630 | 124.0394,295.1686,313.1795,331.1898,373.2002                                                                | C <sub>20</sub> H <sub>25</sub> O <sub>3</sub> -NicA-AcA-B   |

|                  |       |          |          |                                   |                                                               |        |                                                                                                                      |                                                              |
|------------------|-------|----------|----------|-----------------------------------|---------------------------------------------------------------|--------|----------------------------------------------------------------------------------------------------------------------|--------------------------------------------------------------|
| 260              | 13.59 | 618.2690 | 618.2698 | [M+H] <sup>+</sup>                | C <sub>35</sub> H <sub>40</sub> O <sub>9</sub> N              | -1.226 | 124.0394,105.0338,295.1685,313.1793,331.1883,436.2098,454.2199,496.2327,558.2449                                     | C <sub>20</sub> H <sub>25</sub> O <sub>3</sub> -NicA-BzA-AcA |
| 261              | 13.61 | 440.2420 | 440.2431 | [M+H] <sup>+</sup>                | C <sub>26</sub> H <sub>34</sub> O <sub>5</sub> N              | -2.661 | 124.0395,317.2102                                                                                                    | C <sub>20</sub> H <sub>29</sub> O <sub>3</sub> -NicA         |
| 262              | 13.63 | 576.2588 | 576.2592 | [M+H] <sup>+</sup>                | C <sub>33</sub> H <sub>38</sub> O <sub>8</sub> N              | -0.683 | 124.0395,295.1688,313.1801                                                                                           | C <sub>20</sub> H <sub>27</sub> O <sub>4</sub> -NicA-BzA     |
| 263 <sup>a</sup> | 13.64 | 598.3012 | 598.3011 | [M+H] <sup>+</sup>                | C <sub>33</sub> H <sub>44</sub> O <sub>9</sub> N              | 0.237  | 124.0394,297.1844,315.1950,420.2126,438.2253,438.2759,580.2903                                                       | C <sub>20</sub> H <sub>27</sub> O <sub>3</sub> -NicA-C       |
| 264 <sup>a</sup> | 13.65 | 612.2788 | 612.2803 | [M+H] <sup>+</sup>                | C <sub>33</sub> H <sub>42</sub> O <sub>10</sub> N             | -2.487 | 124.0394,295.1688,313.1794,331.1889,418.1996,436.2109,496.2349,552.2549                                              | C <sub>20</sub> H <sub>25</sub> O <sub>3</sub> - NicA-AcA-B  |
| 265              | 13.68 | 513.2471 | 513.2483 | [M+H] <sup>+</sup>                | C <sub>29</sub> H <sub>37</sub> O <sub>8</sub>                | -2.327 | 105.0338,295.1689,313.1793,331.1882,373.2617                                                                         | C <sub>20</sub> H <sub>27</sub> O <sub>4</sub> -BzA-AcA      |
| 266              | 13.72 | 574.2432 | 574.2435 | [M+H] <sup>+</sup>                | C <sub>33</sub> H <sub>36</sub> O <sub>8</sub> N              | -0.598 | 124.0394,295.1689,313.1794,436.2114,454.2209                                                                         | C <sub>20</sub> H <sub>27</sub> O <sub>4</sub> -NicA-2AcA    |
| 267 <sup>a</sup> | 13.72 | 526.2792 | 526.2799 | [M+H] <sup>+</sup>                | C <sub>30</sub> H <sub>40</sub> O <sub>7</sub> N              | -1.385 | 124.0395,297.1833,315.1951,438.2245,526.2792                                                                         | C <sub>20</sub> H <sub>27</sub> O <sub>3</sub> -NicA-A       |
| 268              | 13.76 | 552.2585 | 552.2592 | [M+H] <sup>+</sup>                | C <sub>31</sub> H <sub>38</sub> O <sub>8</sub> N              | -1.256 | 124.0395,295.1682,313.1793                                                                                           | C <sub>20</sub> H <sub>25</sub> O <sub>3</sub> -NicA-B       |
| 269              | 13.78 | 681.2798 | 681.2807 | [M+H] <sup>+</sup>                | C <sub>39</sub> H <sub>41</sub> O <sub>9</sub> N <sub>2</sub> | -1.258 | 124.0394,105.0338,295.1682,313.1790,436.2113,559.2426                                                                | C <sub>20</sub> H <sub>25</sub> O <sub>3</sub> -2NicA-BzA    |
| 270              | 13.78 | 572.2832 | 572.2854 | [M+NH <sub>4</sub> ] <sup>+</sup> | C <sub>31</sub> H <sub>42</sub> O <sub>9</sub> N              | -3.859 | 105.0338,295.1690,313.1794,435.2170                                                                                  | C <sub>20</sub> H <sub>25</sub> O <sub>3</sub> -BzA-2AcA     |
| 271              | 13.80 | 618.2692 | 618.2698 | [M+H] <sup>+</sup>                | C <sub>35</sub> H <sub>40</sub> O <sub>9</sub> N              | -0.903 | 124.0394,105.0337,295.1681,313.1790,331.1896,436.2102,558.2478                                                       | C <sub>20</sub> H <sub>25</sub> O <sub>3</sub> -NicA-BzA-AcA |
| 272 <sup>a</sup> | 13.82 | 656.3053 | 656.3065 | [M+H] <sup>+</sup>                | C <sub>35</sub> H <sub>46</sub> O <sub>11</sub> N             | -1.886 | 124.0394,295.1688,313.1793,331.1906,418.2022,436.2123,496.2326,514.2332,554.2749,578.2737,596.2845,614.2932,638.2908 | C <sub>20</sub> H <sub>25</sub> O <sub>3</sub> -NicA-AcA-C   |
| 273 <sup>a</sup> | 13.82 | 526.2791 | 526.2799 | [M+H] <sup>+</sup>                | C <sub>30</sub> H <sub>40</sub> O <sub>7</sub> N              | -1.575 | 124.0394,297.1842,315.1946,333.2060,456.2358,526.2791                                                                | C <sub>20</sub> H <sub>27</sub> O <sub>3</sub> -NicA-A       |
| 274              | 13.92 | 558.2479 | 558.2486 | [M+H] <sup>+</sup>                | C <sub>33</sub> H <sub>36</sub> O <sub>7</sub> N              | -1.306 | 124.0394,105.0338,295.1689,313.1782,418.1996,436.2094                                                                | C <sub>20</sub> H <sub>25</sub> O <sub>3</sub> -NicA-BzA     |
| 275              | 13.92 | 596.2846 | 596.2854 | [M+H] <sup>+</sup>                | C <sub>33</sub> H <sub>42</sub> O <sub>9</sub> N              | -1.355 | 124.0394,295.1686,313.1793,454.2207,496.2327,536.2610,578.2733                                                       | C <sub>20</sub> H <sub>25</sub> O <sub>3</sub> -NicA-C       |
| 276 <sup>a</sup> | 13.93 | 612.2785 | 612.2803 | [M+H] <sup>+</sup>                | C <sub>33</sub> H <sub>42</sub> O <sub>10</sub> N             | -2.997 | 124.0395,295.1692,313.1794,331.1881,436.2111,454.2218,570.2775                                                       | C <sub>20</sub> H <sub>25</sub> O <sub>3</sub> -NicA-AcA-B   |
| 277              | 13.93 | 530.3099 | 530.3112 | [M+H] <sup>+</sup>                | C <sub>30</sub> H <sub>44</sub> O <sub>7</sub> N              | -2.506 | 124.0395,283.2057,301.2161,424.2469                                                                                  | C <sub>20</sub> H <sub>29</sub> O <sub>2</sub> -NicA-X3      |
| 278 <sup>a</sup> | 13.94 | 526.2788 | 526.2799 | [M+H] <sup>+</sup>                | C <sub>30</sub> H <sub>40</sub> O <sub>7</sub> N              | -2.145 | 124.0395,297.1835,315.1950,456.2339,526.2753                                                                         | C <sub>20</sub> H <sub>27</sub> O <sub>3</sub> -NicA-A       |
| 279 <sup>a</sup> | 13.94 | 679.2642 | 679.2650 | [M+H] <sup>+</sup>                | C <sub>39</sub> H <sub>39</sub> O <sub>9</sub> N <sub>2</sub> | -1.188 | 124.0394,105.0338,293.1531,311.1631,434.1956,557.2263                                                                | C <sub>20</sub> H <sub>25</sub> O <sub>3</sub> -2NicA-BzA    |
| 280 <sup>a</sup> | 13.96 | 616.2537 | 616.2541 | [M+H] <sup>+</sup>                | C <sub>35</sub> H <sub>38</sub> O <sub>9</sub> N              | -0.662 | 124.0394,105.0338,293.1538,311.1635,329.1728,434.1970,494.2168                                                       | C <sub>20</sub> H <sub>25</sub> O <sub>3</sub> -NicA-BzA-AcA |
| 281              | 14.02 | 592.2896 | 592.2905 | [M+NH <sub>4</sub> ] <sup>+</sup> | C <sub>34</sub> H <sub>42</sub> O <sub>8</sub> N              | -1.509 | 105.0338,295.1690,313.1793,331.1899,435.2170,453.2267                                                                | C <sub>20</sub> H <sub>27</sub> O <sub>4</sub> -2BzA         |

|                  |       |          |          |                    |                                                   |        |                                                                         |                                                              |
|------------------|-------|----------|----------|--------------------|---------------------------------------------------|--------|-------------------------------------------------------------------------|--------------------------------------------------------------|
| 282              | 14.03 | 558.2480 | 558.2486 | [M+H] <sup>+</sup> | C <sub>33</sub> H <sub>36</sub> O <sub>7</sub> N  | -1.127 | 124.0394,105.0337,295.1688,313.1790,436.2124                            | C <sub>20</sub> H <sub>25</sub> O <sub>3</sub> -NicA-BzA     |
| 283              | 14.06 | 618.2681 | 618.2698 | [M+H] <sup>+</sup> | C <sub>35</sub> H <sub>40</sub> O <sub>9</sub> N  | -2.682 | 124.0395,105.0338,295.1687,313.1793                                     | C <sub>20</sub> H <sub>25</sub> O <sub>3</sub> -NicA-BzA-AcA |
| 284 <sup>a</sup> | 14.17 | 722.2985 | 722.2960 | [M+H] <sup>+</sup> | C <sub>42</sub> H <sub>44</sub> O <sub>10</sub> N | 3.499  | 124.0394,105.0338,147.0441,295.1683,313.1794,576.2559                   | C <sub>20</sub> H <sub>27</sub> O <sub>4</sub> -NicA-BzA-X4  |
| 285              | 14.18 | 552.2579 | 552.2592 | [M+H] <sup>+</sup> | C <sub>31</sub> H <sub>38</sub> O <sub>8</sub> N  | -2.342 | 124.0394,295.1691,313.1794,331.1906,454.2215                            | C <sub>20</sub> H <sub>25</sub> O <sub>3</sub> -NicA-B       |
| 286 <sup>a</sup> | 14.19 | 738.2886 | 738.2909 | [M+H] <sup>+</sup> | C <sub>42</sub> H <sub>44</sub> O <sub>11</sub> N | -3.098 | 124.0394,105.0337,147.0441,293.1534,311.1683,329.1743,452.2061          | C <sub>20</sub> H <sub>27</sub> O <sub>5</sub> -NicA-BzA-X4  |
| 287 <sup>a</sup> | 14.23 | 612.3152 | 612.3167 | [M+H] <sup>+</sup> | C <sub>34</sub> H <sub>46</sub> O <sub>9</sub> N  | -2.463 | 124.0395,295.1690,313.1791,524.2629,552.2285                            | C <sub>20</sub> H <sub>25</sub> O <sub>3</sub> -NicA-2A      |
| 288              | 14.26 | 554.2735 | 554.2748 | [M+H] <sup>+</sup> | C <sub>31</sub> H <sub>40</sub> O <sub>8</sub> N  | -2.424 | 124.0395,315.1958                                                       | C <sub>20</sub> H <sub>27</sub> O <sub>3</sub> -NicA-B       |
| 289              | 14.30 | 618.2694 | 618.2698 | [M+H] <sup>+</sup> | C <sub>35</sub> H <sub>40</sub> O <sub>9</sub> N  | -0.579 | 124.0394,105.0338,295.1683,313.1790,331.1895,436.2138,454.2206,496.2361 | C <sub>20</sub> H <sub>25</sub> O <sub>3</sub> -NicA-BzA-AcA |
| 290 <sup>a</sup> | 14.31 | 722.2945 | 722.2960 | [M+H] <sup>+</sup> | C <sub>42</sub> H <sub>44</sub> O <sub>10</sub> N | -2.039 | 124.0394,105.0337,147.0440,295.1688,313.1792,436.2118,576.2583,599.2691 | C <sub>20</sub> H <sub>27</sub> O <sub>4</sub> -NicA-BzA-X4  |
| 291              | 14.31 | 495.2401 | 495.2377 | [M+H] <sup>+</sup> | C <sub>29</sub> H <sub>35</sub> O <sub>7</sub>    | 4.786  | 105.0338,295.1691,313.1791,331.1890                                     | C <sub>20</sub> H <sub>25</sub> O <sub>3</sub> -BzA-AcA      |
| 292 <sup>a</sup> | 14.31 | 582.3058 | 582.3061 | [M+H] <sup>+</sup> | C <sub>33</sub> H <sub>44</sub> O <sub>8</sub> N  | -1.105 | 124.0394,281.1897,299.2002,422.2325,494.4600,540.2957                   | C <sub>20</sub> H <sub>27</sub> O <sub>2</sub> -NicA-C       |
| 293 <sup>a</sup> | 14.33 | 455.2414 | 455.2428 | [M+H] <sup>+</sup> | C <sub>27</sub> H <sub>35</sub> O <sub>6</sub>    | -3.109 | 105.0338,297.1841,315.1952,333.2052,437.3414                            | C <sub>20</sub> H <sub>29</sub> O <sub>4</sub> -BzA          |
| 294 <sup>a</sup> | 14.38 | 538.2795 | 538.2799 | [M+H] <sup>+</sup> | C <sub>31</sub> H <sub>40</sub> O <sub>7</sub> N  | -0.797 | 124.0395,299.2000,422.2322                                              | C <sub>20</sub> H <sub>27</sub> O <sub>2</sub> -NicA-B       |
| 295              | 14.41 | 596.2836 | 596.2854 | [M+H] <sup>+</sup> | C <sub>33</sub> H <sub>42</sub> O <sub>9</sub> N  | -3.033 | 124.0393,295.1684,313.1793,454.2215,554.2733                            | C <sub>20</sub> H <sub>25</sub> O <sub>3</sub> -NicA-C       |
| 296 <sup>a</sup> | 14.41 | 656.3066 | 656.3065 | [M+H] <sup>+</sup> | C <sub>35</sub> H <sub>46</sub> O <sub>11</sub> N | 0.095  | 124.0394,295.1688,313.1807,596.2863                                     | C <sub>20</sub> H <sub>25</sub> O <sub>3</sub> -NicA-AcA-C   |
| 297 <sup>a</sup> | 14.44 | 560.2638 | 560.2643 | [M+H] <sup>+</sup> | C <sub>33</sub> H <sub>38</sub> O <sub>7</sub> N  | -0.885 | 124.0395,105.0338,297.1841,315.1950,437.2328                            | C <sub>20</sub> H <sub>27</sub> O <sub>3</sub> -NicA-BzA     |
| 298              | 14.44 | 544.2692 | 544.2694 | [M+H] <sup>+</sup> | C <sub>33</sub> H <sub>38</sub> O <sub>6</sub> N  | -0.302 | 124.0394,105.0338,281.1908,299.2003,422.2360                            | C <sub>20</sub> H <sub>27</sub> O <sub>2</sub> -NicA-BzA     |
| 299              | 14.48 | 530.3102 | 530.3112 | [M+H] <sup>+</sup> | C <sub>30</sub> H <sub>44</sub> O <sub>7</sub> N  | -1.941 | 124.0395,283.2052,301.2159,424.2466,484.2672                            | C <sub>20</sub> H <sub>29</sub> O <sub>2</sub> -NicA-X3      |
| 300 <sup>a</sup> | 14.49 | 722.2974 | 722.2960 | [M+H] <sup>+</sup> | C <sub>42</sub> H <sub>44</sub> O <sub>10</sub> N | 1.976  | 124.0394,105.0338,147.0441,295.1687,313.1794,436.2119,558.2486,600.2574 | C <sub>20</sub> H <sub>27</sub> O <sub>4</sub> -NicA-BzA-X4  |
| 301              | 14.50 | 618.2685 | 618.2698 | [M+H] <sup>+</sup> | C <sub>35</sub> H <sub>40</sub> O <sub>9</sub> N  | -2.035 | 124.0394,105.0338,295.1688,313.1794,331.1895,436.2126,496.2328,558.2507 | C <sub>20</sub> H <sub>25</sub> O <sub>3</sub> -NicA-BzA-AcA |
| 302              | 14.50 | 558.2482 | 558.2486 | [M+H] <sup>+</sup> | C <sub>33</sub> H <sub>36</sub> O <sub>7</sub> N  | -0.768 | 124.0395,105.0338,295.1686,313.1793,435.2140                            | C <sub>20</sub> H <sub>25</sub> O <sub>3</sub> -NicA-BzA     |
| 303              | 14.50 | 575.2627 | 575.2639 | [M+H] <sup>+</sup> | C <sub>34</sub> H <sub>39</sub> O <sub>8</sub>    | -2.163 | 105.0338,295.1690,313.1794,435.2138,558.2721                            | C <sub>20</sub> H <sub>27</sub> O <sub>4</sub> -2BzA         |

|                  |       |          |          |                                   |                                                   |        |                                                                         |                                                              |
|------------------|-------|----------|----------|-----------------------------------|---------------------------------------------------|--------|-------------------------------------------------------------------------|--------------------------------------------------------------|
| 304              | 14.52 | 554.2755 | 554.2748 | [M+H] <sup>+</sup>                | C <sub>31</sub> H <sub>40</sub> O <sub>8</sub> N  | 1.184  | 124.0394,315.1946,438.2276                                              | C <sub>20</sub> H <sub>27</sub> O <sub>3</sub> -NicA-B       |
| 305 <sup>a</sup> | 14.60 | 560.2645 | 560.2643 | [M+H] <sup>+</sup>                | C <sub>33</sub> H <sub>38</sub> O <sub>7</sub> N  | 0.395  | 124.0395,105.0338,297.1842,315.1952                                     | C <sub>20</sub> H <sub>27</sub> O <sub>3</sub> -NicA-BzA     |
| 306 <sup>a</sup> | 14.61 | 535.2681 | 535.2690 | [M+H] <sup>+</sup>                | C <sub>32</sub> H <sub>39</sub> O <sub>7</sub>    | -1.737 | 105.0338,295.1685,313.1797                                              | C <sub>20</sub> H <sub>25</sub> O <sub>3</sub> -BzA-X2       |
| 307              | 14.63 | 552.2576 | 552.2592 | [M+H] <sup>+</sup>                | C <sub>31</sub> H <sub>38</sub> O <sub>8</sub> N  | -2.886 | 124.0394,295.1688,313.1794,436.2094                                     | C <sub>20</sub> H <sub>25</sub> O <sub>3</sub> -NicA-B       |
| 308              | 14.67 | 554.2727 | 554.2748 | [M+H] <sup>+</sup>                | C <sub>31</sub> H <sub>40</sub> O <sub>8</sub> N  | -3.867 | 124.0395,297.1845,315.1952                                              | C <sub>20</sub> H <sub>27</sub> O <sub>3</sub> -NicA-B       |
| 309              | 14.71 | 618.2692 | 618.2698 | [M+H] <sup>+</sup>                | C <sub>35</sub> H <sub>40</sub> O <sub>9</sub> N  | -0.903 | 124.0394,105.0338,295.1691,313.1791,331.1893,373.2003,496.2328,558.9297 | C <sub>20</sub> H <sub>25</sub> O <sub>3</sub> -NicA-BzA-AcA |
| 310 <sup>a</sup> | 14.74 | 752.3038 | 752.3065 | [M+H] <sup>+</sup>                | C <sub>43</sub> H <sub>46</sub> O <sub>11</sub> N | -3.639 | 145.0284,177.0546,124.0394,105.0338,313.1795,436.2116,558.2469          | C <sub>20</sub> H <sub>27</sub> O <sub>4</sub> -NicA-BzA-X5  |
| 311 <sup>a</sup> | 14.75 | 586.3000 | 586.3011 | [M+NH <sub>4</sub> ] <sup>+</sup> | C <sub>32</sub> H <sub>44</sub> O <sub>9</sub> N  | -1.805 | 105.0337,295.1690,313.1793,331.1896,435.2128                            | C <sub>20</sub> H <sub>27</sub> O <sub>4</sub> -BzA-B        |
| 312              | 14.77 | 558.2480 | 558.2486 | [M+H] <sup>+</sup>                | C <sub>33</sub> H <sub>36</sub> O <sub>7</sub> N  | -1.127 | 124.0394,105.0338,295.1690,313.1794,436.2123                            | C <sub>20</sub> H <sub>25</sub> O <sub>3</sub> -NicA-BzA     |
| 313              | 14.78 | 576.2573 | 576.2592 | [M+H] <sup>+</sup>                | C <sub>33</sub> H <sub>38</sub> O <sub>8</sub> N  | -3.286 | 124.0395,105.0338,295.1689,313.1794,331.1879,436.2117,454.2222          | C <sub>20</sub> H <sub>27</sub> O <sub>4</sub> -NicA-BzA     |
| 314 <sup>a</sup> | 14.79 | 646.3004 | 646.3011 | [M+H] <sup>+</sup>                | C <sub>37</sub> H <sub>44</sub> O <sub>9</sub> N  | -1.019 | 124.0395,105.0338,295.1685,313.1793,436.2127,558.2479                   | C <sub>20</sub> H <sub>25</sub> O <sub>3</sub> -NicA-BzA-A   |
| 315              | 14.83 | 544.2684 | 544.2694 | [M+H] <sup>+</sup>                | C <sub>33</sub> H <sub>38</sub> O <sub>6</sub> N  | -1.772 | 124.0394,105.0338,281.1895,299.2000,422.2329                            | C <sub>20</sub> H <sub>27</sub> O <sub>2</sub> -NicA-BzA     |
| 316 <sup>a</sup> | 14.89 | 560.2639 | 560.2643 | [M+H] <sup>+</sup>                | C <sub>33</sub> H <sub>38</sub> O <sub>7</sub> N  | -0.676 | 124.0394,105.0338,297.1840,315.1949,438.2271                            | C <sub>20</sub> H <sub>27</sub> O <sub>3</sub> -NicA-BzA     |
| 317              | 14.91 | 572.2832 | 572.2854 | [M+NH <sub>4</sub> ] <sup>+</sup> | C <sub>31</sub> H <sub>42</sub> O <sub>9</sub> N  | -3.859 | 105.0338,295.1690,313.1794,331.1899,373.2006,435.2166                   | C <sub>20</sub> H <sub>25</sub> O <sub>3</sub> -BzA-2AcA     |
| 318              | 14.96 | 575.2626 | 575.2639 | [M+H] <sup>+</sup>                | C <sub>34</sub> H <sub>39</sub> O <sub>8</sub>    | -2.337 | 105.0338,295.1689,313.1794,435.2160,453.2267                            | C <sub>20</sub> H <sub>27</sub> O <sub>4</sub> -2BzA         |
| 319 <sup>a</sup> | 14.97 | 652.3109 | 652.3116 | [M+H] <sup>+</sup>                | C <sub>36</sub> H <sub>46</sub> O <sub>10</sub> N | -1.108 | 124.0393,295.1687,313.1787,472.3964,490.4098,536.2615,634.2975          | C <sub>20</sub> H <sub>25</sub> O <sub>3</sub> -NicA-B-X2    |
| 320 <sup>a</sup> | 15.00 | 435.2193 | 435.2166 | [M+H] <sup>+</sup>                | C <sub>27</sub> H <sub>31</sub> O <sub>5</sub>    | 6.230  | 105.0338,295.1673,313.1794                                              | C <sub>20</sub> H <sub>25</sub> O <sub>3</sub> -BzA          |
| 321 <sup>a</sup> | 15.05 | 646.3002 | 646.3011 | [M+H] <sup>+</sup>                | C <sub>37</sub> H <sub>44</sub> O <sub>9</sub> N  | -1.638 | 124.0394,105.0337,295.1676,313.1797,524.2620,576.2568                   | C <sub>20</sub> H <sub>25</sub> O <sub>3</sub> -NicA-BzA-A   |
| 322 <sup>a</sup> | 15.13 | 560.2639 | 560.2643 | [M+H] <sup>+</sup>                | C <sub>33</sub> H <sub>38</sub> O <sub>7</sub> N  | -0.676 | 124.0394,105.0338,297.1837,315.1949,438.2266                            | C <sub>20</sub> H <sub>27</sub> O <sub>3</sub> -NicA-BzA     |
| 323              | 15.18 | 558.2482 | 558.2486 | [M+H] <sup>+</sup>                | C <sub>33</sub> H <sub>36</sub> O <sub>7</sub> N  | -0.768 | 124.0394,105.0338,295.1694,313.1794,436.2114                            | C <sub>20</sub> H <sub>25</sub> O <sub>3</sub> -NicA-BzA     |
| 324 <sup>a</sup> | 15.19 | 712.3104 | 712.3116 | [M+H] <sup>+</sup>                | C <sub>41</sub> H <sub>46</sub> O <sub>10</sub> N | -1.717 | 124.0394,105.0338,309.1856,327.1949,345.2056,450.2263,468.2374,590.2743 | C <sub>21</sub> H <sub>29</sub> O <sub>4</sub> -NicA-2BzA    |
| 325 <sup>a</sup> | 15.21 | 658.3010 | 658.3011 | [M+H] <sup>+</sup>                | C <sub>38</sub> H <sub>44</sub> O <sub>9</sub> N  | -0.089 | 124.0394,105.0338,297.1843,315.1951,420.2169,612.2578,640.2881          | C <sub>20</sub> H <sub>25</sub> O <sub>2</sub> -NicA-BzA-B   |
| 326              | 15.22 | 551.2628 | 551.2639 | [M+H] <sup>+</sup>                | C <sub>32</sub> H <sub>39</sub> O <sub>8</sub>    | 0.619  | 105.0338,295.1692,313.1785,435.1790,495.2383                            | C <sub>20</sub> H <sub>25</sub> O <sub>3</sub> -BzA-B        |
| 327 <sup>a</sup> | 15.31 | 652.3102 | 652.3116 | [M+H] <sup>+</sup>                | C <sub>36</sub> H <sub>46</sub> O <sub>10</sub> N | -2.181 | 124.0393,295.1685,313.1790,536.2637,634.3003                            | C <sub>20</sub> H <sub>25</sub> O <sub>3</sub> -NicA-B-X2    |

|                  |       |          |          |                                   |                                                   |        |                                                                             |                                                             |
|------------------|-------|----------|----------|-----------------------------------|---------------------------------------------------|--------|-----------------------------------------------------------------------------|-------------------------------------------------------------|
| 328              | 15.31 | 433.1997 | 433.2010 | [M+H] <sup>+</sup>                | C <sub>27</sub> H <sub>29</sub> O <sub>5</sub>    | -2.887 | 105.0338,311.1632                                                           | C <sub>20</sub> H <sub>23</sub> O <sub>3</sub> -BzA         |
| 329              | 15.31 | 493.2206 | 493.2221 | [M+H] <sup>+</sup>                | C <sub>29</sub> H <sub>33</sub> O <sub>7</sub>    | -3.000 | 105.0338,311.1634,329.1736,433.2007                                         | C <sub>20</sub> H <sub>23</sub> O <sub>3</sub> -BzA-AcA     |
| 330 <sup>a</sup> | 15.31 | 646.3004 | 646.3011 | [M+H] <sup>+</sup>                | C <sub>37</sub> H <sub>44</sub> O <sub>9</sub> N  | -1.019 | 124.0394,105.0338,295.1691,313.1793,436.2107,558.2478                       | C <sub>20</sub> H <sub>25</sub> O <sub>3</sub> -NicA-BzA-A  |
| 331              | 15.32 | 633.2677 | 633.2694 | [M+H] <sup>+</sup>                | C <sub>36</sub> H <sub>41</sub> O <sub>10</sub>   | -2.722 | 105.0338,311.1635,329.1736,433.2010,451.1745,615.2935                       | C <sub>20</sub> H <sub>25</sub> O <sub>4</sub> -2BzA-AcA    |
| 332              | 15.35 | 568.2889 | 568.2878 | [M+NH <sub>4</sub> ] <sup>+</sup> | C <sub>32</sub> H <sub>42</sub> O <sub>8</sub> N  | -2.804 | 105.0337,295.1688,313.1794,417.2251,435.2162                                | C <sub>20</sub> H <sub>25</sub> O <sub>3</sub> -BzA-B       |
| 333 <sup>a</sup> | 15.37 | 511.2313 | 511.2326 | [M+H] <sup>+</sup>                | C <sub>29</sub> H <sub>35</sub> O <sub>8</sub>    | -2.239 | 105.0338,311.1630,329.1738,                                                 | C <sub>20</sub> H <sub>25</sub> O <sub>4</sub> -BzA-AcA     |
| 334 <sup>a</sup> | 15.41 | 439.2467 | 439.2479 | [M+H] <sup>+</sup>                | C <sub>27</sub> H <sub>35</sub> O <sub>5</sub>    | -2.733 | 105.0338,299.2003,421.3026,                                                 | C <sub>20</sub> H <sub>29</sub> O <sub>3</sub> -BzA         |
| 335              | 15.42 | 592.2888 | 592.2905 | [M+NH <sub>4</sub> ] <sup>+</sup> | C <sub>34</sub> H <sub>42</sub> O <sub>8</sub> N  | -2.860 | 105.0338,295.1683,313.1794,331.1898,435.2168,575.2657                       | C <sub>20</sub> H <sub>27</sub> O <sub>4</sub> -2BzA        |
| 336              | 15.43 | 634.2983 | 634.3011 | [M+NH <sub>4</sub> ] <sup>+</sup> | C <sub>36</sub> H <sub>44</sub> O <sub>9</sub> N  | -4.349 | 105.0338,295.1686,313.1792,331.1902,435.2154,                               | C <sub>20</sub> H <sub>25</sub> O <sub>3</sub> -2BzA-AcA    |
| 337 <sup>a</sup> | 15.45 | 644.3044 | 644.3065 | [M+NH <sub>4</sub> ] <sup>+</sup> | C <sub>34</sub> H <sub>46</sub> O <sub>11</sub> N | -3.318 | 105.0338,293.1530,311.1636,329.1742,433.1998,451.2103,511.2316<br>,609.2707 | C <sub>20</sub> H <sub>25</sub> O <sub>4</sub> -BzA-AcA-B   |
| 338              | 15.45 | 609.2721 | 609.2694 | [M+H] <sup>+</sup>                | C <sub>34</sub> H <sub>41</sub> O <sub>10</sub>   | 4.392  | 105.0338,311.1643,329.1740,433.2021,451.2139,451.2139,549.2499<br>,591.402  | C <sub>20</sub> H <sub>23</sub> O <sub>3</sub> -BzA-AcA-B   |
| 339              | 15.47 | 575.2628 | 575.2639 | [M+H] <sup>+</sup>                | C <sub>34</sub> H <sub>39</sub> O <sub>8</sub>    | -1.990 | 105.0338,295.1688,313.1792,331.1896,435.2143                                | C <sub>20</sub> H <sub>27</sub> O <sub>4</sub> -2BzA        |
| 340 <sup>a</sup> | 15.48 | 560.2646 | 560.2643 | [M+H] <sup>+</sup>                | C <sub>33</sub> H <sub>38</sub> O <sub>7</sub> N  | 0.573  | 124.0395,105.0338,297.1851,315.1945                                         | C <sub>20</sub> H <sub>27</sub> O <sub>3</sub> -NicA-BzA    |
| 341              | 15.55 | 680.2845 | 680.2854 | [M+H] <sup>+</sup>                | C <sub>40</sub> H <sub>42</sub> O <sub>9</sub> N  | -1.335 | 124.0394,105.0338,295.1683,313.1792,436.2120,558.2499                       | C <sub>20</sub> H <sub>25</sub> O <sub>3</sub> -NicA-2BzA   |
| 342 <sup>a</sup> | 15.55 | 654.3267 | 654.3274 | [M+H] <sup>+</sup>                | C <sub>36</sub> H <sub>48</sub> O <sub>10</sub> N | -0.876 | 124.0394,297.1845,315.1953,482.3555,520.2679,538.2819,572.6536<br>,636.3153 | C <sub>20</sub> H <sub>27</sub> O <sub>3</sub> -NicA-B-X2   |
| 343 <sup>a</sup> | 15.56 | 660.3174 | 660.3167 | [M+H] <sup>+</sup>                | C <sub>38</sub> H <sub>46</sub> O <sub>9</sub> N  | 1.047  | 105.0338,124.0394,297.1846,315.1948,420.2180,438.2234,514.2217<br>,642.3066 | C <sub>20</sub> H <sub>27</sub> O <sub>3</sub> -NicA-BzA-X2 |
| 344              | 15.63 | 592.2894 | 592.2905 | [M+NH <sub>4</sub> ] <sup>+</sup> | C <sub>34</sub> H <sub>42</sub> O <sub>8</sub> N  | -1.846 | 105.0338,295.1688,313.1793,331.1901                                         | C <sub>20</sub> H <sub>27</sub> O <sub>4</sub> -2BzA        |
| 345              | 15.65 | 680.2842 | 680.2854 | [M+H] <sup>+</sup>                | C <sub>40</sub> H <sub>42</sub> O <sub>9</sub> N  | -1.776 | 124.0394,105.0338,295.1684,313.1792,436.2097,558.2484                       | C <sub>20</sub> H <sub>25</sub> O <sub>3</sub> -NicA-2BzA   |
| 346              | 15.66 | 451.2132 | 451.2115 | [M+H] <sup>+</sup>                | C <sub>27</sub> H <sub>31</sub> O <sub>6</sub>    | 3.734  | 105.0338,293.1592,311.1640,329.1742                                         | C <sub>20</sub> H <sub>25</sub> O <sub>4</sub> -BzA         |
| 347              | 15.74 | 551.2642 | 551.2639 | [M+H] <sup>+</sup>                | C <sub>32</sub> H <sub>39</sub> O <sub>8</sub>    | 0.463  | 105.0338,295.1685,313.1795                                                  | C <sub>20</sub> H <sub>25</sub> O <sub>3</sub> -BzA-B       |
| 348 <sup>a</sup> | 15.74 | 658.2999 | 658.3011 | [M+H] <sup>+</sup>                | C <sub>38</sub> H <sub>44</sub> O <sub>9</sub> N  | -1.760 | 124.0394,105.0338,295.1686,313.1793,417.2050,518.2521,536.2629<br>,640.297  | C <sub>20</sub> H <sub>25</sub> O <sub>3</sub> -NicA-BzA-X2 |

|                  |       |          |          |                                   |                                                   |        |                                                                                  |                                                             |
|------------------|-------|----------|----------|-----------------------------------|---------------------------------------------------|--------|----------------------------------------------------------------------------------|-------------------------------------------------------------|
| 349              | 15.76 | 451.2116 | 451.2115 | [M+H] <sup>+</sup>                | C <sub>27</sub> H <sub>31</sub> O <sub>6</sub>    | 0.188  | 105.0339,293.1533,311.1639,329.1745                                              | C <sub>20</sub> H <sub>25</sub> O <sub>4</sub> -BzA         |
| 350              | 15.76 | 557.2521 | 557.2534 | [M+H] <sup>+</sup>                | C <sub>34</sub> H <sub>37</sub> O <sub>7</sub>    | -2.297 | 105.0339,295.1689,313.1796,435.2123,475.4920                                     | C <sub>20</sub> H <sub>25</sub> O <sub>3</sub> -2BzA        |
| 351              | 15.78 | 608.2842 | 608.2854 | [M+NH <sub>4</sub> ] <sup>+</sup> | C <sub>34</sub> H <sub>42</sub> O <sub>9</sub> N  | -1.986 | 105.0338,293.1531,311.1637,329.1742,347.1850,451.2112                            | C <sub>20</sub> H <sub>27</sub> O <sub>5</sub> -2BzA        |
| 352 <sup>a</sup> | 15.80 | 678.2697 | 678.2698 | [M+H] <sup>+</sup>                | C <sub>40</sub> H <sub>40</sub> O <sub>9</sub> N  | -0.086 | 124.0396,105.0339,293.1535,311.1637,555.2380                                     | C <sub>20</sub> H <sub>23</sub> O <sub>3</sub> -NicA-2BzA   |
| 353 <sup>a</sup> | 15.88 | 435.2148 | 435.2166 | [M+H] <sup>+</sup>                | C <sub>27</sub> H <sub>31</sub> O <sub>5</sub>    | -4.137 | 105.0338,295.1690,313.1795                                                       | C <sub>20</sub> H <sub>25</sub> O <sub>3</sub> -BzA         |
| 354              | 15.91 | 557.2508 | 557.2534 | [M+H] <sup>+</sup>                | C <sub>34</sub> H <sub>37</sub> O <sub>7</sub>    | -4.630 | 105.0338,295.1689,313.1794                                                       | C <sub>20</sub> H <sub>25</sub> O <sub>3</sub> -2BzA        |
| 355              | 15.96 | 680.2844 | 680.2854 | [M+H] <sup>+</sup>                | C <sub>40</sub> H <sub>42</sub> O <sub>9</sub> N  | -1.482 | 124.0394,105.0338,295.1689,313.1791,436.2112,558.2475                            | C <sub>20</sub> H <sub>25</sub> O <sub>3</sub> -NicA-2BzA   |
| 356              | 16.00 | 568.2891 | 568.2878 | [M+NH <sub>4</sub> ] <sup>+</sup> | C <sub>32</sub> H <sub>42</sub> O <sub>8</sub> N  | -2.452 | 105.0338,295.1688,313.1793,435.2164,453.1892,551.2634                            | C <sub>20</sub> H <sub>25</sub> O <sub>3</sub> -BzA-B       |
| 357 <sup>a</sup> | 16.03 | 660.3156 | 660.3167 | [M+H] <sup>+</sup>                | C <sub>38</sub> H <sub>46</sub> O <sub>9</sub> N  | -1.679 | 105.0338,124.0394,297.1847,315.1951,538.2787,642.3064                            | C <sub>20</sub> H <sub>27</sub> O <sub>3</sub> -NicA-BzA-X2 |
| 358 <sup>a</sup> | 16.05 | 722.2936 | 722.2960 | [M+H] <sup>+</sup>                | C <sub>42</sub> H <sub>44</sub> O <sub>10</sub> N | -3.285 | 124.0394,105.0546,131.0492,293.2533,311.1631,329.1743,452.2061,624.4337          | C <sub>20</sub> H <sub>27</sub> O <sub>5</sub> -NicA-BzA-X6 |
| 359              | 16.05 | 573.2454 | 573.2483 | [M+H] <sup>+</sup>                | C <sub>34</sub> H <sub>37</sub> O <sub>8</sub>    | -4.562 | 105.0338,293.1514,311.1636,329.1742,433.1996,457.1981,498.2237                   | C <sub>20</sub> H <sub>25</sub> O <sub>4</sub> -2BzA        |
| 360              | 16.06 | 680.2845 | 680.2854 | [M+H] <sup>+</sup>                | C <sub>40</sub> H <sub>42</sub> O <sub>9</sub> N  | -1.335 | 124.0394,105.0338,295.1683,313.1793,436.2098,558.2469                            | C <sub>20</sub> H <sub>25</sub> O <sub>3</sub> -NicA-2BzA   |
| 361              | 16.08 | 617.2733 | 617.2745 | [M+H] <sup>+</sup>                | C <sub>36</sub> H <sub>41</sub> O <sub>9</sub>    | -1.959 | 105.0338,295.1688,313.1793,331.1898,373.1999,417.2058,435.2155,477.2267          | C <sub>20</sub> H <sub>25</sub> O <sub>3</sub> -2BzA-AcA    |
| 362              | 16.17 | 595.2886 | 595.2902 | [M+H] <sup>+</sup>                | C <sub>34</sub> H <sub>43</sub> O <sub>9</sub>    | -2.619 | 105.0338,115.0755,295.1688,313.1793,417.2057,435.2165                            | C <sub>20</sub> H <sub>25</sub> O <sub>3</sub> -BzA-C       |
| 363              | 16.19 | 592.2892 | 592.2905 | [M+NH <sub>4</sub> ] <sup>+</sup> | C <sub>34</sub> H <sub>42</sub> O <sub>8</sub> N  | -2.184 | 105.0338,295.1687,313.1790,331.1898,435.2158,453.2220,575.2679                   | C <sub>20</sub> H <sub>27</sub> O <sub>4</sub> -2BzA        |
| 364 <sup>a</sup> | 16.26 | 721.2980 | 721.3007 | [M+H] <sup>+</sup>                | C <sub>43</sub> H <sub>45</sub> O <sub>10</sub>   | -3.776 | 105.0338,147.0440,295.1681,313.1794,435.2176,623.4336,645.2123                   | C <sub>20</sub> H <sub>27</sub> O <sub>4</sub> -2BzA-X4     |
| 365 <sup>a</sup> | 16.28 | 570.3050 | 570.3061 | [M+NH <sub>4</sub> ] <sup>+</sup> | C <sub>32</sub> H <sub>44</sub> O <sub>8</sub> N  | -2.005 | 105.0338,297.1845,315.1953,419.2195,437.2311                                     | C <sub>20</sub> H <sub>27</sub> O <sub>3</sub> -BzA-B       |
| 366              | 16.29 | 617.2728 | 617.2745 | [M+H] <sup>+</sup>                | C <sub>36</sub> H <sub>41</sub> O <sub>9</sub>    | -2.769 | 105.0338,295.1687,313.1792,331.1900,355.1894                                     | C <sub>20</sub> H <sub>25</sub> O <sub>3</sub> -2BzA-AcA    |
| 367              | 16.31 | 680.2848 | 680.2854 | [M+H] <sup>+</sup>                | C <sub>40</sub> H <sub>42</sub> O <sub>9</sub> N  | -0.894 | 124.0395,105.0338,295.1683,313.1795,436.2151,662.4343                            | C <sub>20</sub> H <sub>25</sub> O <sub>3</sub> -NicA-2BzA   |
| 368              | 16.40 | 592.2891 | 592.2905 | [M+NH <sub>4</sub> ] <sup>+</sup> | C <sub>34</sub> H <sub>42</sub> O <sub>8</sub> N  | -2.353 | 105.0338,295.1688,313.1793,331.1896,435.2160                                     | C <sub>20</sub> H <sub>27</sub> O <sub>4</sub> -2BzA        |
| 369              | 16.68 | 574.2785 | 574.2799 | [M+NH <sub>4</sub> ] <sup>+</sup> | C <sub>34</sub> H <sub>40</sub> O <sub>7</sub> N  | -2.488 | 105.0338,295.1689,313.1795,435.2096                                              | C <sub>20</sub> H <sub>25</sub> O <sub>3</sub> -2BzA        |
| 370 <sup>a</sup> | 16.71 | 672.3358 | 672.3378 | [M+NH <sub>4</sub> ] <sup>+</sup> | C <sub>36</sub> H <sub>50</sub> O <sub>11</sub> N | -3.031 | 105.0338,115.0755,295.1689,313.1793,331.1880,435.2170,477.2274,612.1678,654.4383 | C <sub>20</sub> H <sub>25</sub> O <sub>3</sub> -BzA-AcA-C   |



|                  |       |          |          |                                   |                                                  |        |                                                                         |                                                           |
|------------------|-------|----------|----------|-----------------------------------|--------------------------------------------------|--------|-------------------------------------------------------------------------|-----------------------------------------------------------|
| 371              | 16.77 | 576.2943 | 576.2956 | [M+NH <sub>4</sub> ] <sup>+</sup> | C <sub>34</sub> H <sub>42</sub> O <sub>7</sub> N | -2.219 | 105.0338,297.1844,315.1950,437.2316,559.2676                            | C <sub>20</sub> H <sub>27</sub> O <sub>3</sub> -2BzA      |
| 372 <sup>a</sup> | 16.83 | 560.2994 | 560.3007 | [M+NH <sub>4</sub> ] <sup>+</sup> | C <sub>34</sub> H <sub>42</sub> O <sub>6</sub> N | -2.257 | 105.0338,281.1900,299.2002,403.2266,421.2355,543.2731                   | C <sub>20</sub> H <sub>27</sub> O <sub>2</sub> -2BzA      |
| 373              | 16.83 | 680.2853 | 680.2854 | [M+H] <sup>+</sup>                | C <sub>40</sub> H <sub>42</sub> O <sub>9</sub> N | -0.159 | 124.0394,105.0339,295.1689,313.1794,435.2165,558.2464                   | C <sub>20</sub> H <sub>25</sub> O <sub>3</sub> -NicA-2BzA |
| 374              | 16.94 | 617.2724 | 617.2745 | [M+H] <sup>+</sup>                | C <sub>36</sub> H <sub>41</sub> O <sub>9</sub>   | -3.417 | 105.0338,295.1689,313.1791,331.1894,435.2161                            | C <sub>20</sub> H <sub>25</sub> O <sub>3</sub> -2BzA-AcA  |
| 375              | 16.95 | 576.2936 | 576.2956 | [M+NH <sub>4</sub> ] <sup>+</sup> | C <sub>34</sub> H <sub>42</sub> O <sub>7</sub> N | -3.434 | 105.0338,297.1846,315.1951,437.2330                                     | C <sub>20</sub> H <sub>27</sub> O <sub>3</sub> -2BzA      |
| 376              | 16.99 | 680.2845 | 680.2854 | [M+H] <sup>+</sup>                | C <sub>40</sub> H <sub>42</sub> O <sub>9</sub> N | -1.335 | 105.0338,124.0394,295.1691,313.1793,435.2159,463.2425,558.2473,662.2675 | C <sub>20</sub> H <sub>25</sub> O <sub>3</sub> -NicA-2BzA |
| 377              | 17.21 | 576.2952 | 576.2956 | [M+NH <sub>4</sub> ] <sup>+</sup> | C <sub>34</sub> H <sub>42</sub> O <sub>7</sub> N | -0.658 | 105.0338,297.1845,315.1951,437.2332                                     | C <sub>20</sub> H <sub>27</sub> O <sub>3</sub> -2BzA      |
| 378              | 17.32 | 576.2952 | 576.2956 | [M+NH <sub>4</sub> ] <sup>+</sup> | C <sub>34</sub> H <sub>42</sub> O <sub>7</sub> N | -0.658 | 105.0338,297.1843,315.1951,437.2328                                     | C <sub>20</sub> H <sub>27</sub> O <sub>3</sub> -2BzA      |
| 379 <sup>a</sup> | 17.69 | 696.3195 | 696.3167 | [M+NH <sub>4</sub> ] <sup>+</sup> | C <sub>41</sub> H <sub>46</sub> O <sub>9</sub> N | 4.009  | 105.0339,295.1692,313.1795,331.1894,417.2027,435.2162,557.2539,679.2894 | C <sub>20</sub> H <sub>25</sub> O <sub>3</sub> -3BzA      |
| 380 <sup>a</sup> | 17.80 | 696.3155 | 696.3167 | [M+NH <sub>4</sub> ] <sup>+</sup> | C <sub>41</sub> H <sub>46</sub> O <sub>9</sub> N | -1.735 | 105.0338,295.1688,313.1793,331.1903,435.2161,557.2585                   | C <sub>20</sub> H <sub>25</sub> O <sub>3</sub> -3BzA      |
| 381              | 18.16 | 576.2943 | 576.2956 | [M+NH <sub>4</sub> ] <sup>+</sup> | C <sub>34</sub> H <sub>42</sub> O <sub>7</sub> N | -2.219 | 105.0337,297.1841,315.1949,437.2337                                     | C <sub>20</sub> H <sub>27</sub> O <sub>3</sub> -2BzA      |

Glc: C<sub>6</sub>H<sub>12</sub>O<sub>6</sub>; A: C<sub>4</sub>H<sub>8</sub>O<sub>2</sub>; B: C<sub>5</sub>H<sub>8</sub>O<sub>3</sub>; C: C<sub>7</sub>H<sub>12</sub>O<sub>4</sub>; X1: C<sub>3</sub>H<sub>8</sub>O<sub>3</sub>; X2: C<sub>5</sub>H<sub>8</sub>O<sub>2</sub>; X3: C<sub>4</sub>H<sub>10</sub>O<sub>3</sub>; X4: C<sub>9</sub>H<sub>6</sub>O<sub>2</sub>; X5: C<sub>10</sub>H<sub>8</sub>O<sub>3</sub>; X6: C<sub>9</sub>H<sub>6</sub>O.

a: compounds with new molecular mass never reported in *Scutellaria barbata*.
